# Supplementary material for: 1,1-Difluoroethyl chloride (CH3CF2Cl), a novel difluoroalkylating reagent for 1,1-difluoroethylation of arylboronic acids
Source: Royal Society of Chemistry journal article supplement (doi:10.1039/c9ra06406k), 2019-01-01

## Supporting Information

### **1,1-Difluoroethyl Chloride (CH<sub>3</sub>CF<sub>2</sub>Cl), A Novel Difluoroalkylating Reagent for 1,1-Difluoroethylation of Arylboronic Acids**

Jianchang Liu,<sup>a</sup> Jida Zhang,<sup>a</sup> Chaolin Wu,<sup>a</sup> Hefu Liu,<sup>a</sup> Hui Liu,<sup>a</sup> Fenggang, Sun,<sup>a</sup>  
Yueyun Li,<sup>a</sup> Yuying Liu,<sup>a</sup> Yunhui Dong,<sup>a</sup> and Xinjin Li\*<sup>a,b</sup>

<sup>a</sup> College of Chemistry and Chemical Engineering, Shandong University of  
Technology, 266 West Xincun Road, Zibo, 255000, China

<sup>b</sup>Key Laboratory of Organofluorine Chemistry, Shanghai Institute of Organic  
Chemistry, Chinese Academy of Sciences, 345 Lingling Road, Shanghai 200032,  
China

## Table of Contents

|                                                                                                                    |    |
|--------------------------------------------------------------------------------------------------------------------|----|
| 1. General Information and Materials .....                                                                         | 3  |
| 2. Optimization of Ni-Catalyzed Cross-Coupling of CH <sub>3</sub> CH <sub>2</sub> Cl with Aryl boronic Acids ..... | 5  |
| 3. The Role of DMAP .....                                                                                          | 10 |
| 3.1 Preparation of NiCl <sub>2</sub> (diOMebpy) and NiCl <sub>2</sub> (DMAP) <sub>4</sub> .....                    | 10 |
| 3.2 Reaction of Nickel complex with CH <sub>3</sub> CF <sub>2</sub> Cl.....                                        | 10 |
| 4. Radical Inhibition and Clock Experiments <sup>[a]</sup> .....                                                   | 12 |
| 4.1 Radical inhibition experiment .....                                                                            | 12 |
| 4.2 Radical clock experiment .....                                                                                 | 13 |
| 5. Experimental Procedures and Characterization Data.....                                                          | 15 |
| 5.1 Ni-catalyzed cross-coupling of arylboronic acids with CH <sub>3</sub> CF <sub>2</sub> Cl.....                  | 15 |
| 5.2 Ni-catalyzed cross-coupling of arylboronic acids with alkyl halides. ....                                      | 21 |
| 6. References .....                                                                                                | 27 |
| 7. <sup>1</sup> H, <sup>19</sup> F and <sup>13</sup> C NMR Spectra of Isolated Products.....                       | 28 |

## 1. General Information and Materials

**General Information:**  $^1\text{H}$ ,  $^{13}\text{C}$  and  $^{19}\text{F}$  NMR spectra were recorded on a 400 MHz NMR spectrometer.  $^1\text{H}$  NMR spectroscopy chemical shifts were determined relative to internal  $\text{Me}_4\text{Si}$  (TMS) at  $\delta$  0.0 or to the signal of the residual protonated solvent  $\text{CDCl}_3$   $\delta$  7.26,  $^{13}\text{C}$  NMR spectroscopy chemical shifts were determined relative to internal TMS at  $\delta$  0.0. For the reaction mixtures,  $^{19}\text{F}$  NMR spectroscopy chemical shifts were determined relative to  $\text{PhCF}_3$  at  $\delta$   $-62.0$ . Data for  $^1\text{H}$ ,  $^{13}\text{C}$  and  $^{19}\text{F}$  NMR spectra are recorded as follows: chemical shift ( $\delta$ , ppm), multiplicity (s = singlet, d = doublet, t = triplet, m = multiplet, q = quartet, br = broad).

FT-IR spectra were obtained with a Nicolet 5700 spectrophotometer. GC-MS data were recorded on a Finnigan 4021 instrument and GCMS-QP2010. Melting points were recorded on a SGW X-4 melting point apparatus and are uncorrected. High resolution mass data were recorded on Waters Micromass GCT Premier and Bruker MicroTof Q II 10410. All reactions were monitored by TLC or  $^{19}\text{F}$  NMR spectroscopy.

**Materials:** All reagents were used as received from commercial sources and used without further purification. DME, 1,4-dioxane, DMF, MeCN and DCE were distilled under reduced pressure from  $\text{CaH}_2$ , and stored over activated molecular sieve. THF and toluene were distilled from sodium and benzophenone immediately before use. The anhydrous  $\text{K}_2\text{CO}_3$  was ground into a fine powder and was dried in vacuo. DMAP was recrystallized from toluene before used. All (hetero)arylboronic acids were used from commercial suppliers.

**Preparation of  $\text{CH}_3\text{CH}_2\text{Cl}$  Stock Solution:** DME was added to a Schlenk tube under  $\text{N}_2$  atmosphere.  $\text{CH}_3\text{CH}_2\text{Cl}$  gas was then slowly bubbled through the DME until the total volume of the solution reach the maximum. The concentration of the  $\text{CH}_3\text{CH}_2\text{Cl}$  stock solution was determined by  $^{19}\text{F}$  NMR using trifluorobenzene as an internal standard (generally 1.3 mol/L).

**Preparation of  $\text{PhCF}_2\text{Cl}^{[1]}$ :** Into a round-bottom teflon flask, was added a

magnetic stirrer and 20 g of Olah's reagent (HF 65-70%). Thereafter, 5g of PhCl<sub>3</sub> was slowly added to the HF-pyridine solution at 15°C, and then keep the reaction at 15-20 °C. A gas-outlet was placed on the top of the reaction flask for the purpose of HCl gas collection. The reaction mixture was stirred for 10 h and the progress of fluorination was monitored by GC-MS. After the reaction was finished, the reaction mixture was poured into iced water, and extracted with cold diethyl ether. The combined organic phase was washed with cold saturated NaHCO<sub>3</sub> aqueous solution and brine. After drying over MgSO<sub>4</sub> and solvent removal, the product was purified by distillation as a colorless oil (purity>95%, determined by <sup>19</sup>F NMR). The impurities were mainly PhCF<sub>3</sub> and PhCFCl<sub>2</sub>. <sup>19</sup>F NMR (376 MHz, CDCl<sub>3</sub>): δ -48.5 (s, 2F). GC-MS (*m/z*): 162 (M<sup>+</sup>), 127 (M<sup>+</sup>-Cl), 77 (M<sup>+</sup>-CF<sub>2</sub>Cl).

## 2. Optimization of Ni-Catalyzed Cross-Coupling of CH<sub>3</sub>CH<sub>2</sub>Cl with Aryl boronic Acids

**General procedure of optimization of Ni-catalyzed cross-coupling of CH<sub>3</sub>CH<sub>2</sub>Cl with aryl boronic acid (2a):** To a 10 mL of Schlenk tube were added 4-biphenylboronic acid (39.6 mg, 0.2 mmol, 1.0 equiv.), Nickel catalyst (1.5-7 mol%), ligand(1.5-7 mol%), base (1.5-4 equiv.) and additive (0.1-1.0 equiv.). The mixture was evacuated and backfilled with N<sub>2</sub> for three times, solvent (2 mL) and CH<sub>3</sub>CF<sub>2</sub>Cl (generally 1.3 mol/L in DME) were then added. The Schlenk tube was screw capped and put into a preheated oil bath (90-130 °C). After stirring for 5-12 h, the reaction mixture was cooled to room temperature and was purified with silica gel chromatography (petroleum ether) to give product **3a**.

**Table S1. Optimization of Ligands<sup>[a]</sup>**

CH3CF2Cl (**1a**) + Ph-B(OH)2 (**2a**)  $\xrightarrow[\text{DME, 110 }^\circ\text{C, 5h}]{\text{Ligand (5 mol\%), NiCl}_2(\text{PPh}_3)_2 \text{ (5 mol\%), K}_2\text{CO}_3 \text{ (2.0 equiv.)}}$  Ph-CF2CH3 (**3a**)

---

bpy

**L1**

**L2**

**L3**

**L4**

phen

**L5**

| Entry | Ligand    | Yield <sup>[b]</sup> [%] |
|-------|-----------|--------------------------|
| 1     | bpy       | 5                        |
| 2     | <b>L1</b> | 15                       |
| 3     | <b>L2</b> | 7                        |
| 4     | <b>L3</b> | 7                        |
| 5     | <b>L4</b> | 5                        |
| 6     | phen      | trace                    |
| 7     | <b>L5</b> | trace                    |

[a] Reaction conditions: **2a** (0.2 mmol, 1.0 equiv.), **1a** (2.6 mmol), DME (2 mL). [b] Isolated

yields.

**Table S2. Optimization of Additives<sup>[a]</sup>**

| Entry | Additive (x mol%)      | Yield <sup>[b]</sup> [%] |
|-------|------------------------|--------------------------|
| 1     | none                   | 15                       |
| 2     | DMAP(10)               | 30                       |
| 3     | DMAP(30)               | 42                       |
| 4     | DMAP(50)               | 49                       |
| 5     | DMAP(70)               | 61                       |
| 6     | DMAP(100)              | 59                       |
| 7     | Py (10)                | trace                    |
| 8     | 3-CNPy (10)            | trace                    |
| 9     | 4-CNPy (10)            | trace                    |
| 10    | DMAP(70)+LiCl(1.0 eq.) | 58                       |

[a] Reaction conditions: **2a** (0.2 mmol, 1.0 equiv.), **1a** (2.6 mmol), DME (2 mL). [b] Isolated yields.

**Table S3. Optimization of Ratio of Nickel Catalyst and Ligand<sup>[a]</sup>**

| Entry | x/y     | Yield <sup>[b]</sup> [%] |
|-------|---------|--------------------------|
| 1     | 7/7     | 43                       |
| 2     | 5/5     | 61                       |
| 3     | 3/3     | 70                       |
| 4     | 1.5/1.5 | 63                       |
| 5     | 0/3     | 0                        |
| 6     | 3/0     | trace                    |

[a] Reaction conditions: **2a** (0.2 mmol, 1.0 equiv.), **1a** (2.6 mmol), DME (2 mL). [b] Isolated

yields.

**Table S4. Optimization of Nickel Catalyst<sup>[a]</sup>**

$\text{CH}_3\text{CF}_2\text{Cl}$  (**1a**) + 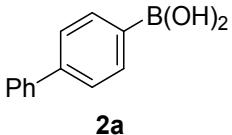  $\xrightarrow[\text{DME, 110 }^\circ\text{C, 5h}]{\begin{array}{l} \text{[Ni]} (3 \text{ mol}\%) \\ \text{L1} (3 \text{ mol}\%) \\ \text{DMAP} (70 \text{ mol}\%) \\ \text{K}_2\text{CO}_3 (2.0 \text{ equiv.}) \end{array}}$   (**3a**)

| Entry | [Ni]                                                 | Yield <sup>[b]</sup> [%] |
|-------|------------------------------------------------------|--------------------------|
| 1     | NiCl <sub>2</sub> (PPh <sub>3</sub> ) <sub>2</sub>   | 70                       |
| 2     | NiCl <sub>2</sub> ·dppe                              | 65                       |
| 3     | NiCl <sub>2</sub> ·DME                               | 49                       |
| 4     | NiCl <sub>2</sub>                                    | 41                       |
| 5     | NiCl <sub>2</sub> (PCy <sub>3</sub> ) <sub>2</sub>   | 45                       |
| 6     | Ni(NO <sub>3</sub> ) <sub>2</sub> ·6H <sub>2</sub> O | 37                       |

[a] Reaction conditions: **2a** (0.2 mmol, 1.0 equiv.), **1a** (2.6 mmol), DME (2 mL). [b] Isolated yields.

**Table S5. Optimization of Reaction Parameters<sup>[a]</sup>**

$\text{CH}_3\text{CF}_2\text{Cl}$  (**1a**) + 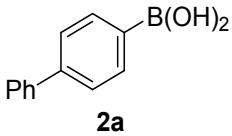  $\xrightarrow[\text{DME, Temp. Time}]{\begin{array}{l} \text{NiCl}_2(\text{PPh}_3)_2 (3 \text{ mol}\%) \\ \text{L1} (3 \text{ mol}\%) \\ \text{DMAP} (70 \text{ mol}\%) \\ \text{K}_2\text{CO}_3 (2.0 \text{ equiv.}) \end{array}}$   (**3a**)

| Entry | CF <sub>2</sub> CH <sub>3</sub> Cl (equiv.) | Temp (°C) | Time (h) | Yield <sup>[b]</sup> [%] |
|-------|---------------------------------------------|-----------|----------|--------------------------|
| 1     | 13                                          | 110       | 12       | 69                       |
| 2     | 13                                          | 110       | 5        | 70                       |
| 3     | 13                                          | 110       | 4        | 59                       |
| 4     | 10                                          | 110       | 5        | 65                       |
| 5     | 6                                           | 110       | 5        | 46                       |
| 6     | 13                                          | 130       | 5        | 43                       |

|   |    |    |    |    |
|---|----|----|----|----|
| 7 | 13 | 90 | 5  | 25 |
| 8 | 13 | 90 | 12 | 57 |

[a] Reaction conditions: **2a** (0.2 mmol, 1.0 equiv.), **1a** (1.2-2.6 mmol), DME (2 mL). [b] Isolated yields.

**Table S6. Optimization of Bases<sup>[a]</sup>**

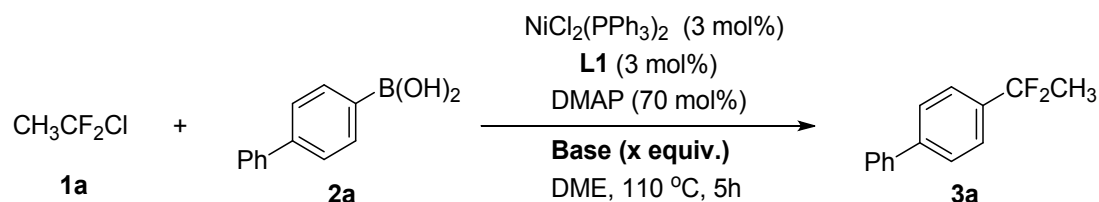

| Entry | Base(x equiv.)                       | Yield <sup>[b]</sup> [%] |
|-------|--------------------------------------|--------------------------|
| 1     | K <sub>2</sub> CO <sub>3</sub> (1.5) | 57                       |
| 2     | K <sub>2</sub> CO <sub>3</sub> (2)   | 70                       |
| 3     | K <sub>2</sub> CO <sub>3</sub> (3)   | 64                       |
| 4     | K <sub>2</sub> CO <sub>3</sub> (4)   | 51                       |
| 5     | LiO <sup>t</sup> Bu (2)              | 33                       |
| 6     | NaO <sup>t</sup> Bu (2)              | nd                       |
| 7     | K <sub>3</sub> PO <sub>4</sub> (2)   | 29                       |
| 8     | Na <sub>2</sub> CO <sub>3</sub> (2)  | 9                        |
| 9     | Cs <sub>2</sub> CO <sub>3</sub> (2)  | nd                       |

[a] Reaction conditions: **2a** (0.2 mmol, 1.0 equiv.), **1a** (2.6 mmol), DME (2 mL). [b] Isolated yields.

**Table S7. Optimization of Solvents<sup>[a]</sup>**

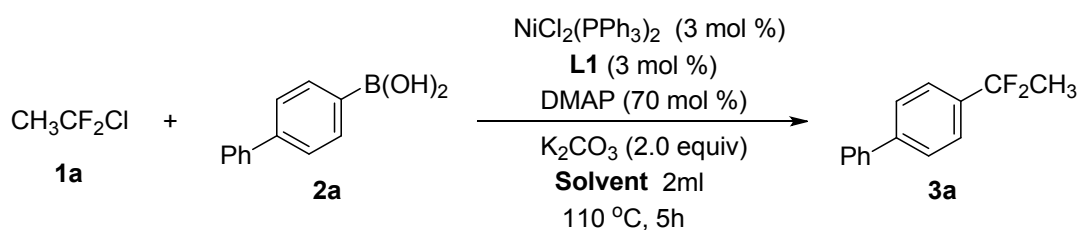

| Entry | Solvent     | Yield <sup>[b]</sup> [%] |
|-------|-------------|--------------------------|
| 1     | DME         | 70                       |
| 2     | triglyme    | 34                       |
| 3     | 1,4-dioxane | 31                       |
| 4     | THF         | 25                       |
| 5     | NMP         | nd                       |
| 6     | DMSO        | nd                       |
| 7     | DMF         | 21                       |



|    |              |       |
|----|--------------|-------|
| 8  | DCE          | trace |
| 9  | toluene      | trace |
| 10 | tert-butanol | 8     |
| 11 | MeCN         | 23    |

[a] Reaction conditions: **2a** (0.2 mmol, 1.0 equiv.), **1a** (2 mmol, 10 equiv.) [b] Isolated yields.

**Table S8. The Effect of H<sub>2</sub>O on the Ni-Catalyzed Reaction<sup>[a]</sup>**

| Entry | Solvent                                                                | Yield <sup>[b]</sup> [%] |
|-------|------------------------------------------------------------------------|--------------------------|
| 1     | DME (without further purification)                                     | 70                       |
| 2     | DME (distilled from CaH <sub>2</sub> )                                 | 69                       |
| 3     | Add H <sub>2</sub> O(1.0 equiv.) to DME (without further purification) | 66                       |

[a] Reaction conditions: **2a** (0.2 mmol, 1.0 equiv.), **1a** (2.6 mmol), DME (2 mL). [b] Isolated yields.

**Table S9. The Effect of Ligands with DMAP<sup>[a]</sup>**

**L1**, G = OMe  
**L2**, G = NH<sub>2</sub>  
**L3**, G = <sup>t</sup>Bu

| Entry | Ligand    | Yield <sup>[b]</sup> [%] |
|-------|-----------|--------------------------|
| 1     | <b>L1</b> | 70                       |
| 2     | <b>L2</b> | 24                       |
| 3     | <b>L3</b> | 61                       |

[a] Reaction conditions: **2a** (0.2 mmol, 1.0 equiv.), **1a** (2.6 mmol), DME (2 mL). [b] Isolated yields.

### 3. The Role of DMAP

#### 3.1 Preparation of NiCl<sub>2</sub>(diOMebpy) and NiCl<sub>2</sub>(DMAP)<sub>4</sub>

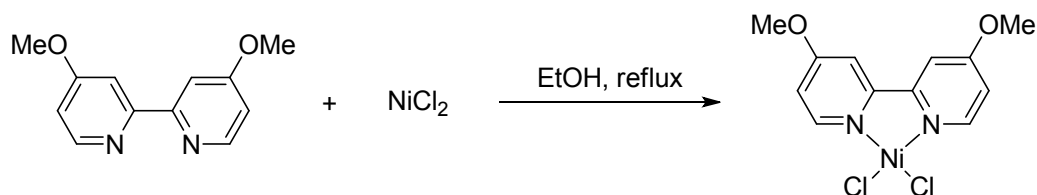

**Preparation of NiCl<sub>2</sub>(diOMebpy)** <sup>[2]</sup>: To a solution of NiCl<sub>2</sub> (65 mg, 0.5 mmol) in ethanol (10 mL) was added a solution of 4,4'-diOMebpy (108 mg, 0.5 mmol) in ethanol (10 mL). The reaction mixture was refluxed with stirring for 10 h. The yellow solution slowly became green. The solution was filtrated and the filtrate was evaporated in vacuo to give a crude product NiCl<sub>2</sub>(diOMebpy) 152mg (88% yield). The crude product was recrystallized from methanol.

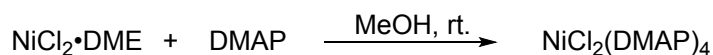

**Preparation of NiCl<sub>2</sub>(DMAP)<sub>4</sub>** <sup>[2]</sup>: To a stirring solution of DMAP (293 mg, 2.4 mmol) in MeOH (5 mL) was added dropwise a solution of NiCl<sub>2</sub>·DME (66 mg, 0.3 mmol) in MeOH (5 mL). After the reaction mixture was stirred at room temperature for another 6 h, the solution was filtrated. The filtrate was evaporated in vacuo to give a blue solid NiCl<sub>2</sub>(DMAP)<sub>4</sub> 172 mg (93% yield). The crude product was recrystallized from methanol.

#### 3.2 Reaction of Nickel complex with CH<sub>3</sub>CF<sub>2</sub>Cl

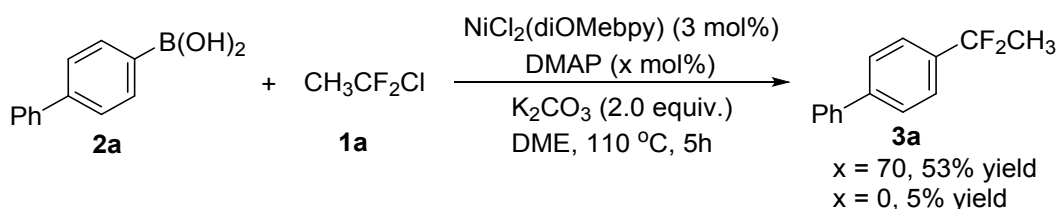

**Procedure:** To a 10 mL of Schlenk tube were added 4-biphenylboronic acid (39.6 mg, 0.2 mmol, 1.0 equiv.), NiCl<sub>2</sub>(diOMebpy) (2 mg, 3 mol%), K<sub>2</sub>CO<sub>3</sub> (55.2 mg, 2.0 equiv.), DMAP(70 mol% or none). The mixture was evacuated and backfilled with N<sub>2</sub> for three times, DME (2 mL) and CH<sub>3</sub>CF<sub>2</sub>Cl (generally 1.3 mol/L in DME) were then

added. The Schlenk tube was screw capped and put into a preheated oil bath (110 °C). After stirring for 5h, the reaction mixture was cooled to room temperature and was purified with silica gel chromatography (petroleum ether) to give product **3a**.

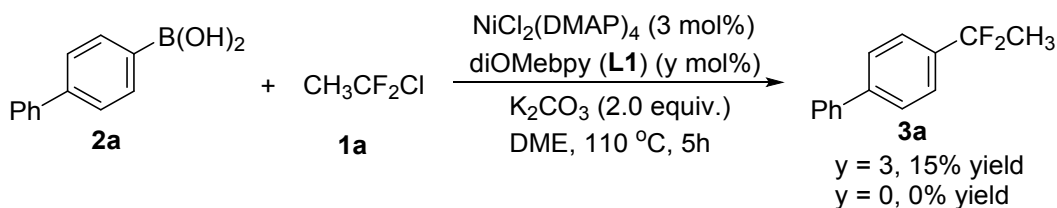

**Procedure:** To a 10 mL of Schlenk tube were added 4-biphenylboronic acid (39.6 mg, 0.2 mmol, 1.0 equiv.), NiCl<sub>2</sub>(DMAP)<sub>4</sub> (3.7 mg, 3 mol%), **L1** (3 mol% or none), K<sub>2</sub>CO<sub>3</sub> (55.2mg, 2.0 equiv.). The mixture was evacuated and backfilled with N<sub>2</sub> for three times, DME (2 mL) and CH<sub>3</sub>CF<sub>2</sub>Cl (generally 1.3 mol/L in DME) were then added. The Schlenk tube was screw capped and put into a preheated oil bath (110 °C). After stirring for 5h, the reaction mixture was cooled to room temperature and was purified with silica gel chromatography (petroleum ether) to give product **3a**.

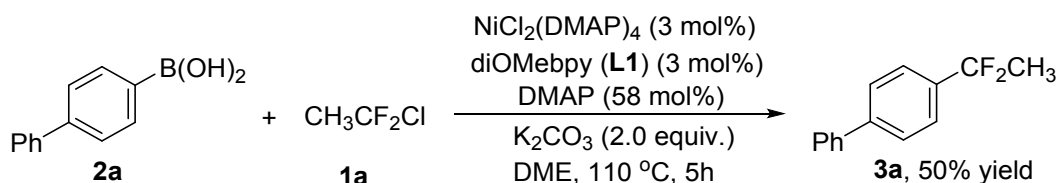

**Procedure:** To a 10 mL of Schlenk tube were added 4-biphenylboronic acid (39.6 mg, 0.2 mmol, 1.0 equiv.), NiCl<sub>2</sub>(DMAP)<sub>4</sub> (3.7 mg, 3 mol%), **L1** (1.3 mg, 3 mol%), K<sub>2</sub>CO<sub>3</sub> (55.2 mg, 2.0 equiv.), DMAP(14.1mg, 58 mol%). The mixture was evacuated and backfilled with N<sub>2</sub> for three times, DME (2 mL) and CH<sub>3</sub>CF<sub>2</sub>Cl (generally 1.3 mol/L in DME) were then added. The Schlenk tube was screw capped and put into a preheated oil bath (110 °C). After stirring for 5h, the reaction mixture was cooled to room temperature and was purified with silica gel chromatography (petroleum ether) to give product **3a** 22mg (50% yield).

## 4. Radical Inhibition and Clock Experiments<sup>[a]</sup>

### 4.1 Radical inhibition experiment

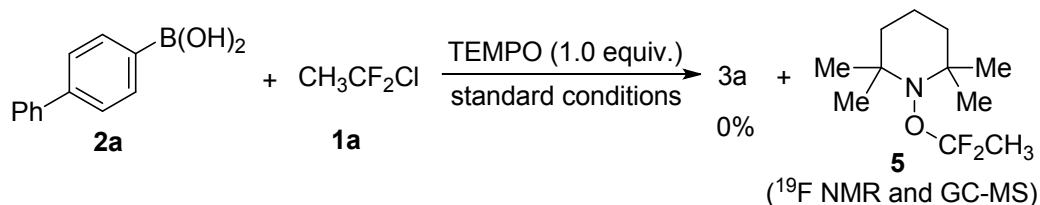

**Procedure:** To a 10 mL of Schlenk tube were added 4-biphenylboronic acid (39.6 mg, 0.2 mmol, 1.0 equiv.), NiCl<sub>2</sub>(PPh<sub>3</sub>)<sub>2</sub> (3.9 mg, 3 mol%), L1 (1.3 mg, 3 mol%), K<sub>2</sub>CO<sub>3</sub> (55.2mg, 2.0 equiv.) DMAP (17.1 mg, 70 mol%) and TEMPO (31.2 mg, 1.0 equiv.). The mixture was evacuated and backfilled with N<sub>2</sub> for three times, DME (2 mL) and CH<sub>3</sub>CF<sub>2</sub>Cl (generally 1.3 mol/L in DME) were then added. The Schlenk tube was screw capped and put into a preheated oil bath (110 °C). After stirring for 5h, the reaction mixture was cooled to room temperature. The yield was determined by <sup>19</sup>F NMR spectroscopy using PhCF<sub>3</sub> as an internal standard.

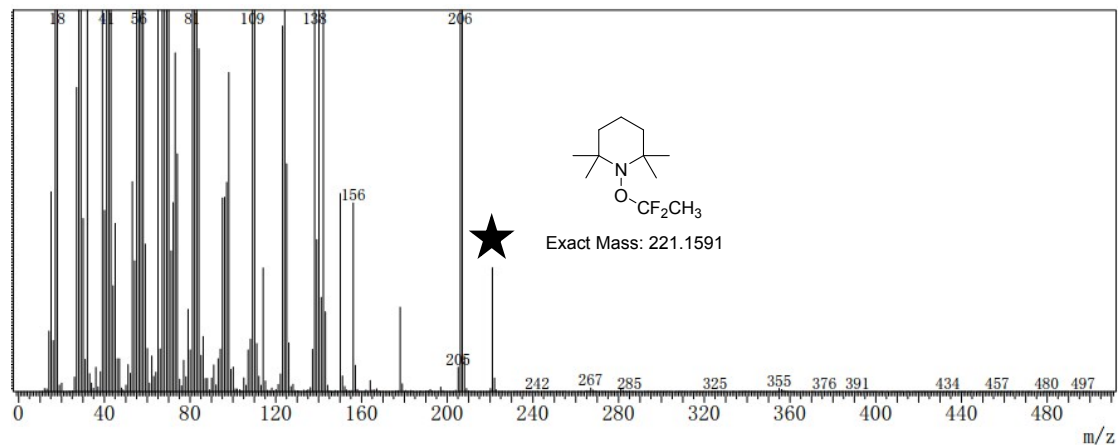

**Figure S1.** GC-MS analysis of adding TEMPO to Standard reaction conditions

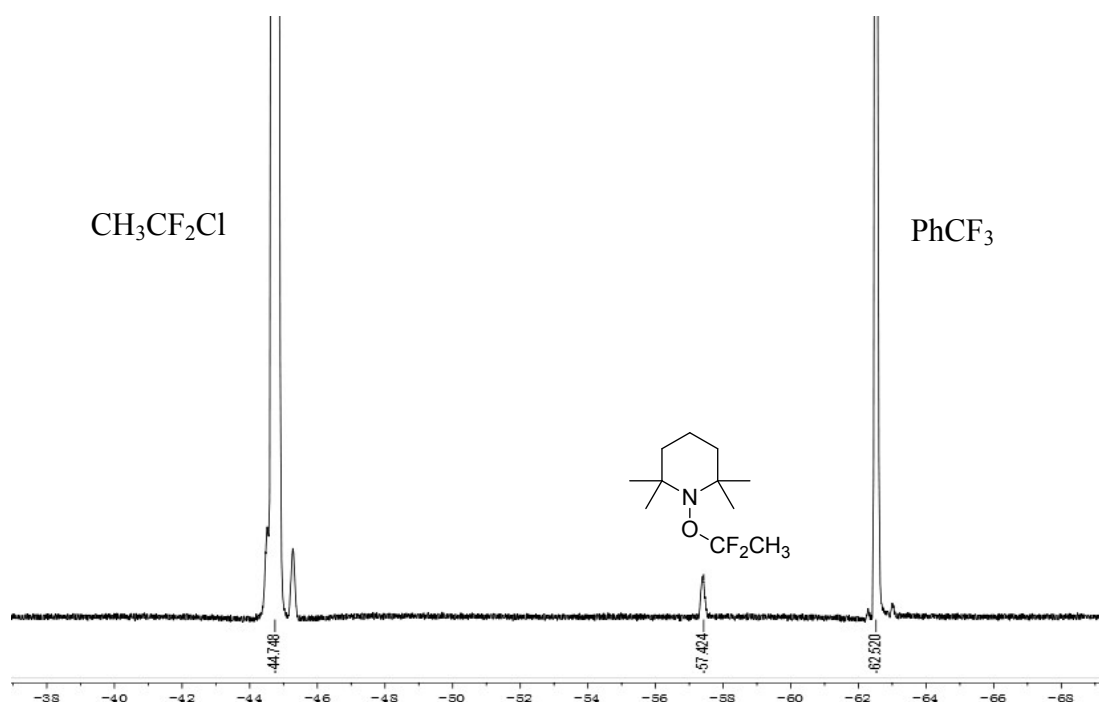

**Figure S2.**  $^{19}\text{F}$  NMR analysis of adding TEMPO to standard reaction conditions

## 4.2 Radical clock experiment

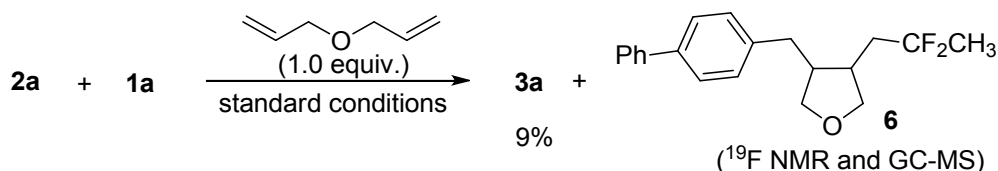

**Procedure:** To a 10 mL of Schlenk tube were added 4-biphenylboronic acid (39.6 mg, 0.2 mmol, 1.0 equiv.),  $\text{NiCl}_2(\text{PPh}_3)_2$  (3.9 mg, 3 mol%), **L1** (1.3 mg, 3 mol%),  $\text{K}_2\text{CO}_3$  (55.2 mg, 2.0 equiv.), DMAP (17.1 mg, 70 mol%) and allyl ether (19.6 mg, 1.0 equiv.). The mixture was evacuated and backfilled with  $\text{N}_2$  for three times, DME (2 mL) and  $\text{CH}_3\text{CF}_2\text{Cl}$  (generally 1.3 mol/L in DME) were then added. The Schlenk tube was screw capped and put into a preheated oil bath (110 °C). After stirring for 5h, the reaction mixture was cooled to room temperature. The yield was determined by  $^{19}\text{F}$  NMR spectroscopy using  $\text{PhCF}_3$  as an internal standard.

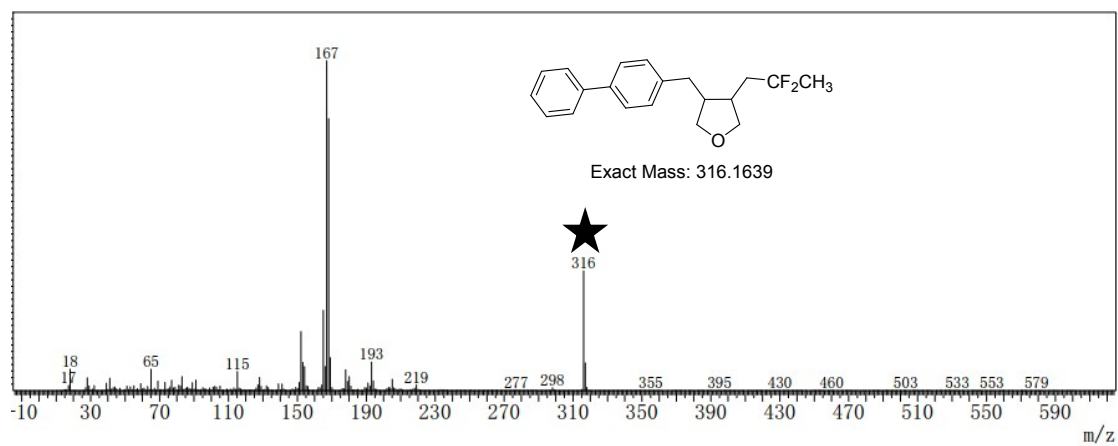

**Figure S3.** GC-MS analysis of adding allyl ether to standard reaction conditions

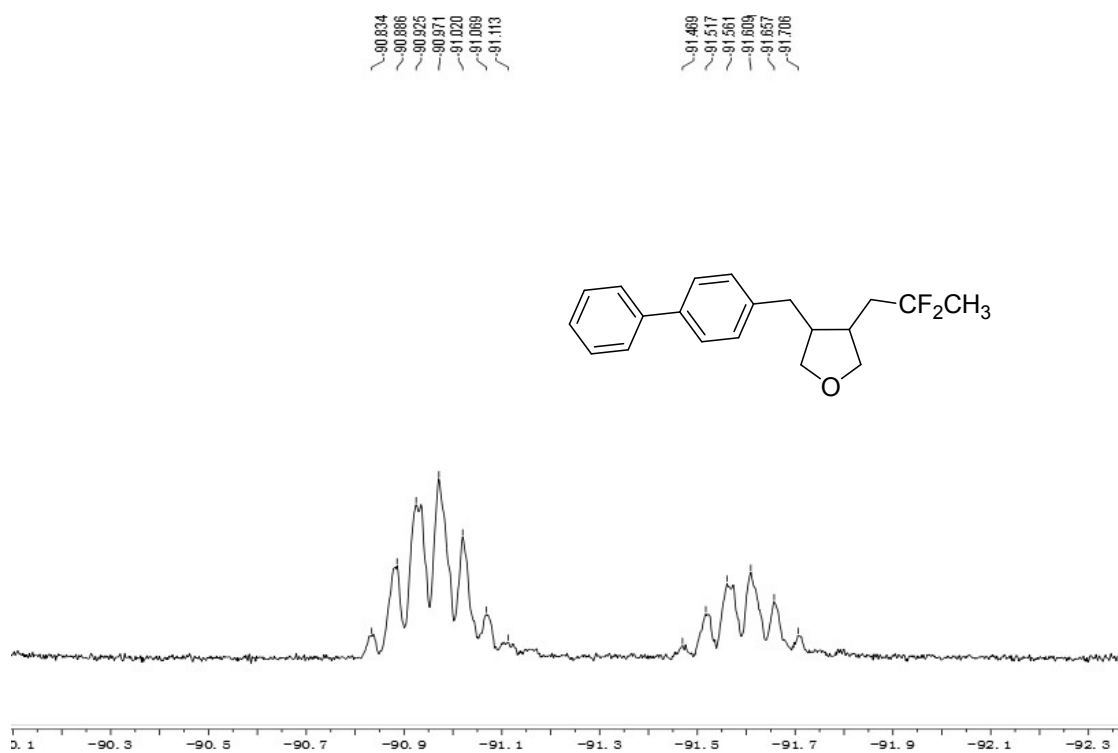

**Figure S4.**  $^{19}\text{F}$  NMR analysis of adding allyl ether to standard reaction conditions

## 5. Experimental Procedures and Characterization Data

### 5.1 Ni-catalyzed cross-coupling of arylboronic acids with CH<sub>3</sub>CF<sub>2</sub>Cl.

**Typical Experiment Procedure:** To a 10 mL of Schlenk tube were added arylboronic acid (0.2 mmol, 1.0 equiv.), NiCl<sub>2</sub>(PPh<sub>3</sub>)<sub>3</sub> (3.9 mg, 3 mol%), **L1** (1.3 mg, 3 mol%), K<sub>2</sub>CO<sub>3</sub> (55.2 mg, 2.0 equiv.), DMAP (17.1 mg, 70 mol%). The mixture was evacuated and backfilled with N<sub>2</sub> for three times, DME (2 mL) and CH<sub>3</sub>CF<sub>2</sub>Cl (generally 1.3 mol/L in DME) were then added. The Schlenk tube was screw capped and put into a preheated oil bath (110 °C). After stirring for 5 h, the reaction mixture was cooled to room temperature and purified by silica gel chromatography to give product.

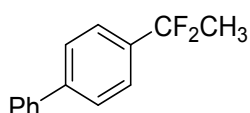

#### 4-(1,1-Difluoroethyl)-1,1'-biphenyl (**3a**)<sup>[3]</sup>

For 0.2 mmol scale, the standard procedure of method was followed to provide **3a** by column chromatography on silica gel (petroleum ether) as a white solid (31 mg, 70%). M.p.: 62–64 °C. IR (KBr): 3080, 3032, 3006, 1680, 1488, 1388, 1305, 1166, 1112, 921, 766, 692, 581 cm<sup>-1</sup>. <sup>1</sup>H NMR (400 MHz, CDCl<sub>3</sub>): δ 7.65-7.57 (m, 6H), 7.45 (t, *J* = 7.2 Hz, 2H), 7.40-7.36 (m, 1H), 1.96 (t, *J* = 18.2 Hz, 3H). <sup>19</sup>F NMR (376 MHz, CDCl<sub>3</sub>): -87.2 (q, *J* = 18.0 Hz, 2F). GC-MS (*m/z*): 218 (M<sup>+</sup>), 203 (M<sup>+</sup>-CH<sub>3</sub>), 153 (M<sup>+</sup>-CF<sub>2</sub>-CH<sub>3</sub>).

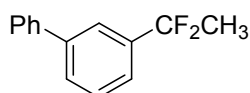

#### 3-(1,1-Difluoroethyl)-1,1'-biphenyl (**3b**)<sup>[3]</sup>

For 0.2 mmol scale, the standard procedure of method was followed to provide **3b** by column chromatography on silica gel (petroleum ether) as a colorless oil (24 mg, 54%). IR (thin film): 3061, 3003, 2927, 1483, 1384, 1316, 1178, 929, 759, 704,

599 $\text{cm}^{-1}$ .  $^1\text{H}$  NMR (400 MHz,  $\text{CDCl}_3$ ):  $\delta$  7.72 (s, 1H), 7.64-7.63 (m, 1H), 7.59 (d,  $J = 8.0$  Hz, 2H), 7.49-7.43 (m, 4H), 7.37 (t,  $J = 7.4$  Hz, 1H), 1.96 (t,  $J = 18.2$  Hz, 3H).  $^{19}\text{F}$  NMR (376 MHz,  $\text{CDCl}_3$ ):  $\delta$  -87.6 (q,  $J = 18.0$  Hz, 2F).  $^{13}\text{C}$  NMR (100 MHz,  $\text{CDCl}_3$ ):  $\delta$  141.6, 140.5, 138.7 (t,  $^2J_{\text{C-F}} = 26.4$  Hz), 129.0, 128.9, 128.5, 127.7, 127.3, 123.52 (t,  $^3J_{\text{C-F}} = 6.2$  Hz), 123.48 (t,  $^3J_{\text{C-F}} = 5.8$  Hz), 121.9 (t,  $^1J_{\text{C-F}} = 237.7$  Hz), 26.1 (t,  $^2J_{\text{C-F}} = 29.7$  Hz).

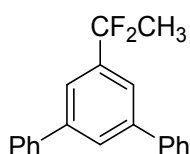

#### 5'--(1,1-Difluoroethyl)-1,1':3',1''-terphenyl (**3c**)

For 0.2 mmol scale, the standard procedure of method was followed to provide **3c** by column chromatography on silica gel (petroleum ether) as a colorless oil (23 mg, 39%). IR (thin film): 3061, 3037, 2854, 1599, 1433, 1254, 1179, 1144, 930, 759, 698  $\text{cm}^{-1}$ .  $^1\text{H}$  NMR (400 MHz,  $\text{CDCl}_3$ ):  $\delta$  7.86 (s, 1H), 7.71 (s, 2H), 7.67, (d,  $J = 7.2$  Hz, 4H), 7.49 (t,  $J = 7.2$  Hz, 4H), 7.41 (t,  $J = 7.2$  Hz, 2H), 2.00 (t,  $J = 18.0$  Hz, 3H).  $^{19}\text{F}$  NMR (376 MHz,  $\text{CDCl}_3$ ):  $\delta$  -87.6 (q,  $J = 18.2$  Hz, 2F).  $^{13}\text{C}$  NMR (100 MHz,  $\text{CDCl}_3$ ):  $\delta$  142.3, 140.5, 139.3 (t,  $^2J_{\text{C-F}} = 26.3$  Hz), 128.9, 127.9, 127.4, 127.3, 122.4 (t,  $^3J_{\text{C-F}} = 6.0$  Hz), 121.9 (t,  $^1J_{\text{C-F}} = 238.0$  Hz), 26.2 (t,  $^2J_{\text{C-F}} = 29.7$ ). GC-MS ( $m/z$ ): 294 ( $\text{M}^+$ ), 279 ( $\text{M}^+ - \text{CH}_3$ ). HRMS (EI): calcd. For  $\text{C}_{20}\text{H}_{16}\text{F}_2$  ( $\text{M}^+$ ): 294.1220, found: 294.1223.

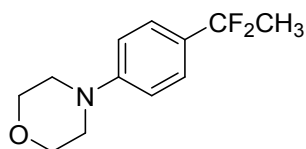

#### 4-(4-(1,1-Difluoroethyl)phenyl)morpholine (**3h**)

For 0.2 mmol scale, the standard procedure of method was followed to provide **3h** by column chromatography on silica gel (petroleum ether/EtOAc = 20:1) as a white solid (12 mg, 28%). M.p.: 56-58  $^{\circ}\text{C}$ . IR (KBr): 2965, 2861, 1615, 1521, 1385, 1239, 1115, 925, 828, 622, 579  $\text{cm}^{-1}$ .  $^1\text{H}$  NMR (400 MHz,  $\text{CDCl}_3$ ):  $\delta$  7.41 (d,  $J = 8.4$  Hz, 2H), 6.91 (d,  $J = 8.8$  Hz, 2H), 3.87 (t,  $J = 4.8$  Hz, 4H), 3.2 (t,  $J = 5.0$  Hz, 4H), 1.91 (t,



$J = 18.0$  Hz, 3H).  $^{19}\text{F}$  NMR (376 MHz,  $\text{CDCl}_3$ ):  $\delta$  -85.4 (q,  $J = 18.0$  Hz, 2F).  $^{13}\text{C}$  NMR (100 MHz,  $\text{CDCl}_3$ ):  $\delta$  152.1 129.1 (t,  $^2J_{\text{C-F}} = 26.9$  Hz), 125.8 (t,  $^3J_{\text{C-F}} = 5.9$  Hz), 122.1 (t,  $^1J_{\text{C-F}} = 236.2$  Hz), 114.8, 66.8, 48.7, 25.8 (t,  $^2J_{\text{C-F}} = 30.3$  Hz). GC-MS ( $m/z$ ): 227 ( $\text{M}^+$ ), 65 ( $\text{CF}_2\text{CH}_3^+$ ). HRMS (EI): calcd. For  $\text{C}_{12}\text{H}_{15}\text{F}_2\text{NO}$  ( $\text{M}^+$ ): 227.1122, found: 227.1128.

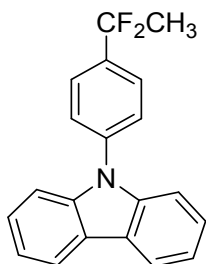

### 9-(4-(1,1-Difluoroethyl)phenyl)-9H-carbazole (**3j**)

For 0.2 mmol scale, the standard procedure of method was followed to provide **3j** by column chromatography on silica gel (petroleum ether) as a white solid (38 mg, 62%). M.p.: 150–152 °C. IR (KBr): 3250, 3003, 1610, 1517, 1453, 1295, 1232, 1175, 907, 752, 628, 570  $\text{cm}^{-1}$ .  $^1\text{H}$  NMR (400 MHz,  $\text{CDCl}_3$ ):  $\delta$  8.17 (d,  $J = 7.6$  Hz, 2H), 7.76 (d,  $J = 8.4$  Hz, 2H), 7.66 (d,  $J = 8.4$  Hz, 2H), 7.46-7.41 (m, 4H), 7.34-7.30 (m, 2H), 2.05 (t,  $J = 18.2$  Hz, 3H).  $^{19}\text{F}$  NMR (376 MHz,  $\text{CDCl}_3$ ):  $\delta$  -87.2 (q,  $J = 18.2$  Hz, 2F).  $^{13}\text{C}$  NMR (100 MHz,  $\text{CDCl}_3$ ):  $\delta$  140.6, 139.1, 137.1 (t,  $^2J_{\text{C-F}} = 26.9$  Hz), 127.0, 126.4 (t,  $^3J_{\text{C-F}} = 5.9$  Hz), 126.1, 123.6, 121.7 (t,  $^1J_{\text{C-F}} = 237.6$  Hz), 120.4, 120.3, 109.7, 26.0 (t,  $^2J_{\text{C-F}} = 29.7$  Hz). GC-MS ( $m/z$ ): 307 ( $\text{M}^+$ ), 292 ( $\text{M}^+ - \text{CH}_3$ ), 242 ( $\text{M}^+ - \text{CF}_2 - \text{CH}_3$ ), 65 ( $\text{CF}_2\text{CH}_3^+$ ). HRMS (ESI): calcd. For  $\text{C}_{20}\text{H}_{16}\text{F}_2\text{N}$  ( $\text{M} + \text{H}^+$ ): 308.1251, found: 308.1254.

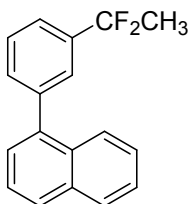

### 1-(3-(1,1-Difluoroethyl)phenyl)naphthalene (**3k**)

For 0.2 mmol scale, the standard procedure of method was followed to provide **3k**

by column chromatography on silica gel (petroleum ether) as a colorless oil (12 mg, 26%). IR (thin film): 3060, 2927, 1591, 1509, 1394, 1313, 1180, 1083, 928, 798, 708, 601  $\text{cm}^{-1}$ .  $^1\text{H}$  NMR (400 MHz,  $\text{CDCl}_3$ ):  $\delta$  7.94-7.84 (m, 3H), 7.65 (s, 1H), 7.60-7.43 (m, 7H), 1.99 (t,  $J = 18.2$  Hz, 3H).  $^{19}\text{F}$  NMR (376 MHz,  $\text{CDCl}_3$ ):  $\delta$  -87.3 (q,  $J = 18.2$  Hz, 2F).  $^{13}\text{C}$  NMR (100 MHz,  $\text{CDCl}_3$ ):  $\delta$  141.1, 139.4, 138.3 (t,  $^2J_{\text{C-F}} = 26.4$  Hz), 133.8, 131.5, 131.4, 128.5, 128.4, 128.1, 127.1, 126.3 (t,  $^3J_{\text{C-F}} = 5.9$  Hz), 126.0, 125.7, 125.4, 123.5 (t,  $^3J_{\text{C-F}} = 5.9$  Hz), 121.9 (t,  $^1J_{\text{C-F}} = 237.6$  Hz), 26.1 (t,  $^2J_{\text{C-F}} = 29.7$  Hz). GC-MS ( $m/z$ ): 268 ( $\text{M}^+$ ), 203 ( $\text{M}^+ - \text{CF}_2 - \text{CH}_3$ ). HRMS (EI): calcd. For  $\text{C}_{18}\text{H}_{14}\text{F}_2$  ( $\text{M}^+$ ): 268.1064, found: 268.1071.

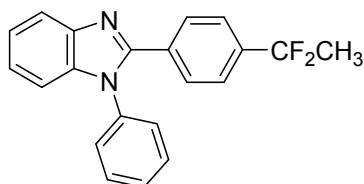

### 2-(4-(1,1-Difluoroethyl)phenyl)-1-phenyl-1H-benzo[d]imidazole (**3I**)

For 0.2 mmol scale, the standard procedure of method was followed to provide **3I** by column chromatography on silica gel (DCM) as a white solid (11 mg, 16%). M.p.: 98-100  $^{\circ}\text{C}$ . IR (KBr): 3060, 2927, 1509, 1394, 1266, 1180, 1083, 928, 798, 779, 708, 601  $\text{cm}^{-1}$ .  $^1\text{H}$  NMR (400 MHz,  $\text{CDCl}_3$ ):  $\delta$  7.90 (d,  $J = 7.6$  Hz, 1H), 7.63 (d,  $J = 8.4$  Hz, 2H), 7.55-7.50 (m, 3H), 7.44 (d,  $J = 8.4$  Hz, 2H), 7.38-7.25 (m, 5H), 1.90 (t,  $J = 18.2$  Hz, 3H).  $^{19}\text{F}$  NMR (376 MHz,  $\text{CDCl}_3$ ):  $\delta$  -88.0 (q,  $J = 18.2$  Hz, 2F).  $^{13}\text{C}$  NMR (100 MHz,  $\text{CDCl}_3$ ): 151.3, 142.9, 139.0 (t,  $^2J_{\text{C-F}} = 26.7$  Hz), 137.3, 136.8, 131.4, 130.0, 129.5, 128.8, 127.4, 124.7 (t,  $^3J_{\text{C-F}} = 5.9$  Hz), 123.7, 123.2, 121.6 (t,  $^1J_{\text{C-F}} = 237.8$  Hz), 120.0, 110.6, 25.9 (t,  $^2J_{\text{C-F}} = 29.5$  Hz). GC-MS ( $m/z$ ): 334 ( $\text{M}^+$ ). HRMS (ESI): calcd. For  $\text{C}_{21}\text{H}_{17}\text{F}_2\text{N}_2$  ( $\text{M}+\text{H}^+$ ): 335.1360, found: 335.1371.

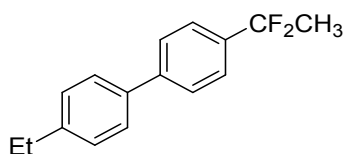

### 4-(1,1-Difluoroethyl)-4'-ethyl-1,1'-biphenyl (**3m**)

For 0.2 mmol scale, the standard procedure of method was followed to provide **3m** by column chromatography on silica gel (petroleum ether) as a white solid (30 mg, 61%). M.p.: 107–109 °C. IR (KBr): 2966, 2931, 2874, 1613, 1501, 1398, 1300, 1176, 1124, 918, 821, 651, 573  $\text{cm}^{-1}$ .  $^1\text{H}$  NMR (400 MHz,  $\text{CDCl}_3$ ):  $\delta$  7.63 (d,  $J = 8.4$  Hz, 2H), 7.58–7.52 (m, 4H), 7.30 (d,  $J = 8.4$  Hz, 2H), 2.71 (q,  $J = 7.6$  Hz, 2H), 1.96 (t,  $J = 18.0$  Hz, 3H), 1.29 (t,  $J = 7.6$  Hz, 3H).  $^{19}\text{F}$  NMR (376 MHz,  $\text{CDCl}_3$ ):  $\delta$  -87.2 (q,  $J = 18.2$  Hz, 2F).  $^{13}\text{C}$  NMR (100 MHz,  $\text{CDCl}_3$ ):  $\delta$  144.0, 142.6, 137.6, 136.7 (t,  $^2J_{\text{C-F}} = 26.6$  Hz), 128.4, 127.1, 127.0, 125.1 (t,  $^3J_{\text{C-F}} = 5.9$  Hz), 122.0 (t,  $^1J_{\text{C-F}} = 237.2$  Hz), 28.6, 26.0 (t,  $^2J_{\text{C-F}} = 29.9$  Hz), 15.6. GC-MS ( $m/z$ ): 246 ( $\text{M}^+$ ), 231 ( $\text{M}^+ - \text{CH}_3$ ), 181 ( $\text{M}^+ - \text{CF}_2 - \text{CH}_3$ ), 65 ( $\text{CF}_2\text{CH}_3^+$ ). HRMS (EI): calcd. For  $\text{C}_{16}\text{H}_{16}\text{F}_2$  ( $\text{M}^+$ ): 246.1220, found: 246.1221.

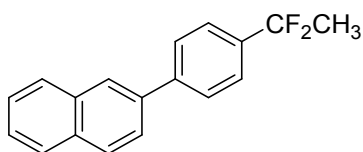

### 2-(4-(1,1-Difluoroethyl)phenyl)naphthalene (**3n**)

For 0.2 mmol scale, the standard procedure of method was followed to provide **3n** by column chromatography on silica gel (petroleum ether) as a white solid (29 mg, 55%). M.p.: 115–117 °C. IR (KBr): 3056, 2925, 1734, 1388, 1304, 1111, 922, 818, 748, 585, 477  $\text{cm}^{-1}$ .  $^1\text{H}$  NMR (400 MHz,  $\text{CDCl}_3$ ):  $\delta$  8.07 (s, 1H), 7.96–7.88 (m, 3H), 7.79–7.74, (m, 3H), 7.64 (d,  $J = 8.4$  Hz, 2H), 7.56–7.50 (m, 2H), 2.00 (t,  $J = 18.2$  Hz, 3H).  $^{19}\text{F}$  NMR (376 MHz,  $\text{CDCl}_3$ ):  $\delta$  -87.3 (q,  $J = 18.0$  Hz, 2F).  $^{13}\text{C}$  NMR (100 MHz,  $\text{CDCl}_3$ ):  $\delta$  142.6, 137.6, 137.1 (t,  $^2J_{\text{C-F}} = 26.6$  Hz), 133.6, 132.8, 128.6, 128.3, 127.7, 127.5, 126.5, 126.3, 126.1, 125.4, 125.2 (t,  $^3J_{\text{C-F}} = 5.8$  Hz), 122.0 (t,  $^1J_{\text{C-F}} = 237.3$  Hz), 26.0 (t,  $^2J_{\text{C-F}} = 29.8$  Hz). GC-MS ( $m/z$ ): 268 ( $\text{M}^+$ ), 253 ( $\text{M}^+ - \text{CH}_3$ ), 65 ( $\text{CF}_2\text{CH}_3^+$ ). HRMS (EI): calcd. For  $\text{C}_{18}\text{H}_{14}\text{F}_2$  ( $\text{M}^+$ ): 268.1064, found: 268.1068.

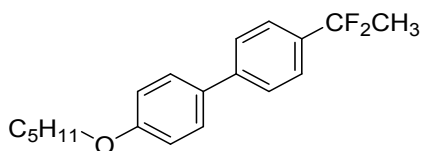

#### 4-(1,1-Difluoroethyl)-4'-(pentyloxy)-1,1'-biphenyl (**3o**)

For 0.2 mmol scale, the standard procedure of method was followed to provide **3o** by column chromatography on silica gel (petroleum ether) as a white solid (31 mg, 51%). M.p.: 117–119 °C. IR (KBr): 2957, 2875, 1606, 1501, 1385, 1305, 1171, 1130, 1051, 922, 820, 604, 536  $\text{cm}^{-1}$ .  $^1\text{H}$  NMR (400 MHz,  $\text{CDCl}_3$ ):  $\delta$  7.61-7.51 (m, 6H), 6.98 (d,  $J = 8.8$  Hz, 2H), 4.01 (t,  $J = 6.6$  Hz, 2H), 1.96 (t,  $J = 18.0$  Hz, 3H), 1.86-1.79 (m, 2H), 1.51-1.36 (m, 4H), 0.95 (t,  $J = 7.2$  Hz, 3H).  $^{19}\text{F}$  NMR (376 MHz,  $\text{CDCl}_3$ ):  $\delta$  -87.1 (q,  $J = 18.0$  Hz, 2F).  $^{13}\text{C}$  NMR (100 MHz,  $\text{CDCl}_3$ ):  $\delta$  159.1, 142.3, 136.3 (t,  $^2J_{\text{C-F}} = 26.6$  Hz), 132.5, 128.2, 126.7, 125.1 (t,  $^3J_{\text{C-F}} = 5.9$  Hz), 122.0 (t,  $^1J_{\text{C-F}} = 237.1$  Hz), 114.9, 68.1, 29.0, 28.2, 26.0 (t,  $^2J_{\text{C-F}} = 29.9$  Hz), 22.5, 14.1. GC-MS ( $m/z$ ): 304 ( $\text{M}^+$ ), 233 ( $\text{M}^+ - \text{C}_5\text{H}_{11}$ ). HRMS (EI): calcd. For  $\text{C}_{20}\text{H}_{16}\text{F}_2$  ( $\text{M}^+$ ): 304.1639, found: 304.1635.

**Typical Experiment Procedure for highly volatile products:** To a 10 mL of Schlenk tube were added arylboronic acid (0.2 mmol, 1.0 equiv.),  $\text{NiCl}_2(\text{PPh}_3)_3$  (3.9 mg, 3 mol%), **L1** (1.3 mg, 3 mol%),  $\text{K}_2\text{CO}_3$  (55.2 mg, 2.0 equiv.), DMAP (17.1 mg, 70 mol%). The mixture was evacuated and backfilled with  $\text{N}_2$  for three times, DME (2 mL) and  $\text{CH}_3\text{CF}_2\text{Cl}$  (generally 1.3 mol/L in DME) were then added. The Schlenk tube was screw capped and put into a preheated oil bath (110 °C). After stirring for 5h, the reaction mixture was cooled to room temperature. The yield was determined by  $^{19}\text{F}$  NMR spectroscopy using  $\text{PhCF}_3$  as an internal standard.

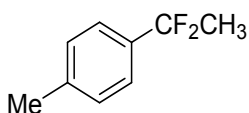

#### 1-(1,1-difluoroethyl)-4-methylbenzene (**3d**)<sup>14</sup>

For 0.2 mmol scale, the yield (34%) was determined by  $^{19}\text{F}$  NMR spectroscopy using  $\text{PhCF}_3$  as an internal standard. Characterization of **3d** in reaction solution:  $^{19}\text{F}$  NMR (376 MHz,  $\text{CDCl}_3$ ):  $\delta$  -86.1 (q,  $J = 17.9$  Hz, 2F). GC-MS ( $m/z$ ): 156 ( $\text{M}^+$ ), 141

( $M^+ - CH_3$ ), 91 ( $M^+ - CF_2 - CH_3$ ), 65 ( $CF_2CH_3^+$ )

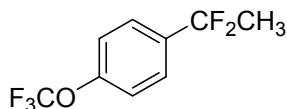

**1-(1,1-difluoroethyl)-4-(trifluoromethoxy)benzene (3g)**

For 0.2 mmol scale, the yield (35%) was determined by  $^{19}F$  NMR spectroscopy using  $PhCF_3$  as an internal standard. Characterization of **3g** in reaction solution:  $^{19}F$  NMR (376 MHz,  $CDCl_3$ ):  $\delta$  -57.2 (s, 3F), -86.7 (q,  $J = 18.2$  Hz, 2F). GC-MS ( $m/z$ ): 226 ( $M^+$ ), 211 ( $M^+ - CH_3$ ).

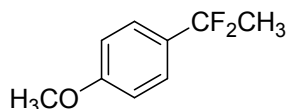

**1-(1,1-difluoroethyl)-4-methoxybenzene (3e)** <sup>[4]</sup>

For 0.2 mmol scale, the yield (33%) was determined by  $^{19}F$  NMR spectroscopy using  $PhCF_3$  as an internal standard. Characterization of **3e** in reaction solution:  $^{19}F$  NMR (376 MHz,  $CDCl_3$ ):  $\delta$  -84.8 (q,  $J = 17.9$  Hz, 2F). GC-MS ( $m/z$ ): 172 ( $M^+$ ), 65 ( $CF_2CH_3^+$ ).

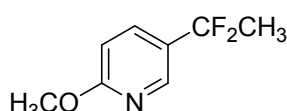

**5-(1,1-difluoroethyl)-2-methoxypyridine (3i)**

For 0.2 mmol scale, the yield (27%) was determined by  $^{19}F$  NMR spectroscopy using  $PhCF_3$  as an internal standard. Characterization of **3i** in reaction solution:  $^{19}F$  NMR (376 MHz,  $CDCl_3$ ):  $\delta$  -86.3 (q,  $J = 18.4$  Hz, 2F). GC-MS ( $m/z$ ): 173 ( $M^+$ ), 158 ( $M^+ - CH_3$ ).

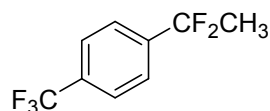

**1-(1,1-difluoroethyl)-4-(trifluoromethyl)benzene (3f)** <sup>[4]</sup>

For 0.2 mmol scale, the yield (40%) was determined by  $^{19}\text{F}$  NMR spectroscopy using  $\text{PhCF}_3$  as an internal standard. Characterization of **3f** in reaction solution:  $^{19}\text{F}$  NMR (376 MHz,  $\text{CDCl}_3$ ):  $\delta$  -62.2 (s, 3F), -87.7 (q,  $J = 18.2$  Hz, 2F). GC-MS ( $m/z$ ): 210 ( $\text{M}^+$ ), 195 ( $\text{M}^+ - \text{CH}_3$ ), 145 ( $\text{M}^+ - \text{CF}_2 - \text{CH}_3$ ).

## 5.2 Ni-catalyzed cross-coupling of arylboronic acids with alkyl halides.

**Procedure:** To a 10 mL of Schlenk tube were added arylboronic acid (0.2 mmol, 1.0 equiv.),  $\text{NiCl}_2(\text{PPh}_3)_3$  (3.9 mg, 3 mol%), **L1** (1.3 mg, 3 mol%),  $\text{K}_2\text{CO}_3$  (55.2 mg, 2.0 equiv.), DMAP (17.1 mg, 70 mol%). The mixture was evacuated and backfilled with  $\text{N}_2$  for three times, DME (2 mL) and  $\text{CF}_2\text{HCl}$  (generally 10.0 equiv) were then added. The Schlenk tube was screw capped and put into a preheated oil bath (110  $^\circ\text{C}$ ). After stirring for 5 h, the reaction mixture was cooled to room temperature and purified by silica gel chromatography to give product.

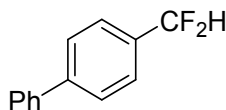

### 4-(Difluoromethyl)-1,1'-biphenyl (**4a**)<sup>[3]</sup>

For 0.2 mmol scale, the standard procedure of method was followed to provide **4a** by column chromatography on silica gel (petroleum ether) as a white solid (20 mg, 50%). M.p:70-72  $^\circ\text{C}$ . IR (KBr): 3059, 2965, 1614, 1488, 1380, 1226, 1077, 1025, 839 766, 694  $\text{cm}^{-1}$ .  $^1\text{H}$  NMR (400 MHz,  $\text{CDCl}_3$ ):  $\delta$  7.68 (d,  $J = 8.0$  Hz, 2H), 7.60 (t,  $J = 7.2$  Hz, 4H), 7.48 (t,  $J = 7.4$  Hz, 2H), 7.40 (t,  $J = 7.4$  Hz, 1H), 6.71, (t,  $J = 56.6$  Hz, 1H).  $^{19}\text{F}$  NMR (376 MHz,  $\text{CDCl}_3$ ):  $\delta$  -110.3 (d,  $J = 56.4$  Hz, 2F). GC-MS ( $m/z$ ): 204 ( $\text{M}^+$ ), 127 ( $\text{M}^+ - \text{Ph}$ ).

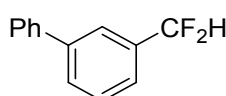

### 3-(Difluoromethyl)-1,1'-biphenyl (**4b**)<sup>[3]</sup>

For 0.2 mmol scale, the standard procedure of method was followed to provide **4b** by column chromatography on silica gel (petroleum ether) as a colorless oil (12 mg, 29%). IR (thin film): 3359, 3063, 2921, 1481, 1370, 1120, 1030, 899, 804, 759, 700, 615, 550  $\text{cm}^{-1}$ .  $^1\text{H}$  NMR (400 MHz,  $\text{CDCl}_3$ ):  $\delta$  7.73-7.72 (m, 2H), 7.61 (d,  $J = 7.6$  Hz, 2H), 7.56-7.45 (m, 4H), 7.39 (t,  $J = 7.4$  Hz, 1H), 6.72 (t,  $J = 56.6$  Hz, 1H).  $^{19}\text{F}$  NMR (376 MHz,  $\text{CDCl}_3$ ):  $\delta$  -110.6 (d,  $J = 56.4$  Hz, 2F). GC-MS ( $m/z$ ): 204 ( $\text{M}^+$ ), 153( $\text{M}^+$ - $\text{CF}_2\text{H}$ ), 127 ( $\text{M}^+$ -Ph),

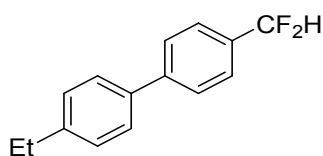

#### 4-(Difluoromethyl)-4'-ethyl-1,1'-biphenyl (**4c**)

For 0.2 mmol scale, the standard procedure of method was followed to provide **4c** by column chromatography on silica gel (petroleum ether) as a white solid (21 mg, 46%). M.p.: 102-104  $^{\circ}\text{C}$ . IR (KBr): 3031, 2970, 2878, 1611, 1500, 1402, 1075, 1026, 818, 730, 552, 521  $\text{cm}^{-1}$ .  $^1\text{H}$  NMR (400 MHz,  $\text{CDCl}_3$ ):  $\delta$  7.69 (d,  $J = 8.0$  Hz, 2H), 7.60-7.54 (m, 4H), 7.33 ( $J = 8.0$  Hz, 2H), 6.71 (t,  $J = 56.6$  Hz, 1H), 2.74 (q,  $J = 7.6$  Hz, 2H), 1.31 (t,  $J = 7.6$  Hz, 3H).  $^{19}\text{F}$  NMR (376 MHz,  $\text{CDCl}_3$ ):  $\delta$  -110.2 (d,  $J = 56.6$  Hz, 2F).  $^{13}\text{C}$  NMR (100 MHz,  $\text{CDCl}_3$ ):  $\delta$  144.2, 143.7, 137.5, 132.9 (t,  $^2J_{\text{C-F}} = 22.3$  Hz), 128.5, 127.3, 127.2, 126.0 (t,  $^3J_{\text{C-F}} = 5.9$  Hz), 114.8 (t,  $^1J_{\text{C-F}} = 236.9$  Hz), 28.6, 15.6. GC-MS ( $m/z$ ): 232 ( $\text{M}^+$ ), 217 ( $\text{M}^+$ - $\text{CH}_3$ ), 181 ( $\text{M}^+$ - $\text{CF}_2\text{H}$ ). HRMS (EI): calcd. For  $\text{C}_{15}\text{H}_{14}\text{F}_2$  ( $\text{M}^+$ ): 232.1064, found: 232.1067.

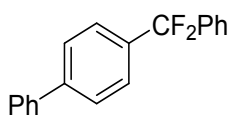

#### 4-(Difluorophenyl)methyl-1,1'-biphenyl (**4d**)<sup>[5]</sup>

To a 10 mL of Schlenk tube were added 4-biphenylboronic acid (39.6 mg, 0.2 mmol, 1.0 equiv.),  $\text{NiCl}_2(\text{PPh}_3)_3$  (3.9 mg, 3 mol%), **L1** (1.3 mg, 3 mol%),  $\text{K}_2\text{CO}_3$  (55.2 mg, 2.0 equiv.), DMAP (17.1 mg, 70 mol%). The mixture was evacuated and

backfilled with N<sub>2</sub> for three times, DME (2 mL) and PhCF<sub>2</sub>Cl (162 mg, 175 μl 5.0 equiv.) were then added. The Schlenk tube was screw capped and put into a preheated oil bath (110 °C). After stirring for 5h, the reaction mixture was cooled to room temperature and purified by column chromatography on silica gel (petroleum ether) to product **4d** that a white solid (6 mg, 11%). M.p.: 78-80 °C. IR (KBr): 3450, 3345, 3064, 2922, 2851, 1450, 1272, 1236, 1047, 961, 838, 755, 696, 607 cm<sup>-1</sup>. <sup>1</sup>H NMR (400 MHz, CDCl<sub>3</sub>): δ 7.64 (d, *J* = 8.4 Hz, 2H), 7.60-7.55 (m, 6H), 7.48-7.44 (m, 5H), 7.38 (t, *J* = 7.2 Hz, 1H), <sup>19</sup>F NMR (376 MHz, CDCl<sub>3</sub>): δ -88.6 (s, 2F). GC-MS (*m/z*): 280 (M<sup>+</sup>), 203 (M<sup>+</sup>-Ph), 127(PhCF<sub>2</sub><sup>+</sup>).

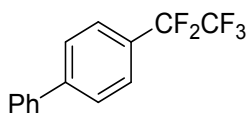

#### 4-(Perfluoroethyl)-1,1'-biphenyl (**4e**)<sup>[6]</sup>

To a 10 mL of Schlenk tube were added 4-biphenylboronic acid (39.6 mg, 0.2 mmol, 1.0 equiv.), NiCl<sub>2</sub>(PPh<sub>3</sub>)<sub>3</sub> (3.9 mg, 3 mol%), **L1** (1.3 mg, 3 mol%), K<sub>2</sub>CO<sub>3</sub> (55.2 mg, 2.0 equiv.), DMAP (17.1 mg, 70 mol%). The mixture was evacuated and backfilled with N<sub>2</sub> for three times, DME (2 mL) and CF<sub>3</sub>CF<sub>2</sub>Cl (generally 10.0 equiv) were then added. The Schlenk tube was screw capped and put into a preheated oil bath (110 °C). After stirring for 5h, the reaction mixture was cooled to room temperature and purified by column chromatography on silica gel (petroleum ether) to product **4e** that a white solid (10 mg, 19%). M.p.:68-70 °C. IR (KBr): 3358, 2923, 2852, 1407, 1292, 1205, 1114, 1093, 974, 841, 739, 691 cm<sup>-1</sup>. <sup>1</sup>H NMR (400 MHz, CDCl<sub>3</sub>): δ 7.7 (q, *J* = 8.8 Hz, 4H), 7.61 (d, *J* = 7.6 Hz, 2H), 7.48 (t, *J* = 7.6 Hz, 2H), 7.41 (t, *J* = 7.2 Hz, 1H), <sup>19</sup>F NMR (376 MHz, CDCl<sub>3</sub>): δ -84.7 (s, 3F), -114.7 (s, 2F). GC-MS (*m/z*): 272 (M<sup>+</sup>), 203 (M<sup>+</sup>-CF<sub>3</sub>).

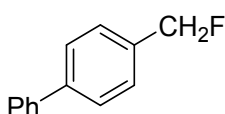

#### 4-(Fluoromethyl)-1,1'-biphenyl (**4f**)<sup>[7]</sup>

To a 10 mL of Schlenk tube were added 4-biphenylboronic acid (39.6 mg, 0.2



mmol, 1.0 equiv.), NiCl<sub>2</sub>(PPh<sub>3</sub>)<sub>3</sub> (3.9 mg, 3 mol%), **L1** (1.3 mg, 3 mol%), K<sub>2</sub>CO<sub>3</sub> (55.2 mg, 2.0 equiv.), DMAP (17.1 mg, 70 mol%). The mixture was evacuated and backfilled with N<sub>2</sub> for three times, DME (2 mL) and CH<sub>2</sub>FCl (generally 10.0 equiv.) were then added. The Schlenk tube was screw capped and put into a preheated oil bath (110 °C). After stirring for 5h, the reaction mixture was cooled to room temperature and purified by column chromatography on silica gel (petroleum ether) to product **4f** that a white solid (9 mg, 25%). GC-MS (*m/z*): 186 (M<sup>+</sup>), 109 (M<sup>+</sup>-Ph), 153 (M<sup>+</sup>-CH<sub>2</sub>F).

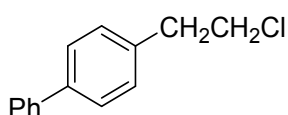

#### 4-(2-Chloroethyl)-1,1'-biphenyl (**4g**)<sup>[8]</sup>

To a 10 mL of Schlenk tube were added 4-biphenylboronic acid (39.6 mg, 0.2 mmol, 1.0 equiv.), NiCl<sub>2</sub>(PPh<sub>3</sub>)<sub>3</sub> (3.9 mg, 3 mol%), **L1** (1.3 mg, 3 mol%), K<sub>2</sub>CO<sub>3</sub> (55.2 mg, 2.0 equiv.), DMAP (17.1 mg, 70 mol%). The mixture was evacuated and backfilled with N<sub>2</sub> for three times, DME (2 mL) and ClCH<sub>2</sub>CH<sub>2</sub>Cl (98 mg, 78 μl, 5.0 equiv) were then added. The Schlenk tube was screw capped and put into a preheated oil bath (110 °C). After stirring for 5h, the reaction mixture was cooled to room temperature and purified by column chromatography on silica gel (petroleum ether) to product **4g** that a white solid (34 mg, 79%). M.p.: 25-27 °C. IR (KBr): 3401, 3029, 2927, 1601, 1487, 1246, 1108, 825, 748, 698 503 cm<sup>-1</sup>. <sup>1</sup>H NMR (400 MHz, CDCl<sub>3</sub>): δ 7.60-7.55 (m, 4H), 7.44 (t, *J* = 7.6 Hz, 2H), 7.37-7.30 (m, 3H), 3.76 (t, *J* = 7.4 Hz, 2H), 3.12 (t, *J* = 7.4 Hz, 2H). <sup>13</sup>C NMR (100 MHz, CDCl<sub>3</sub>): δ 140.8, 139.9, 137.1, 129.3, 128.8, 127.3, 127.2, 127.1, 44.9, 38.8. GC-MS (*m/z*): 216 (M<sup>+</sup>), 167 (M<sup>+</sup>-CH<sub>2</sub>Cl)

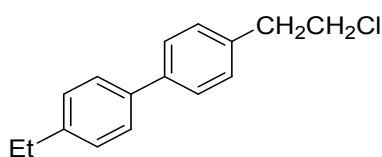

#### 4-(2-Chloroethyl)-4'-ethyl-1,1'-biphenyl (**4h**)

To a 10 mL of Schlenk tube were added (4'-Ethyl[1,1'-biphenyl]-4-yl)-boronic (0.2 mmol, 1.0 equiv.), NiCl<sub>2</sub>(PPh<sub>3</sub>)<sub>3</sub> (3.9 mg, 3 mol%), **L1** (1.3 mg, 3 mol%), K<sub>2</sub>CO<sub>3</sub> (55.2 mg, 2.0 equiv.), DMAP (17.1 mg, 70 mol%). The mixture was evacuated and backfilled with N<sub>2</sub> for three times, DME (2 mL) and ClCH<sub>2</sub>CH<sub>2</sub>Cl (98 mg, 78  $\mu$ l, 5.0 equiv) were then added. The Schlenk tube was screw capped and put into a preheated oil bath (110 °C). After stirring for 5h, the reaction mixture was cooled to room temperature and purified by column chromatography on silica gel (petroleum ether) to product **4h** that a white solid (31 mg, 64%). M.p.:83-85 °C. IR (KBr): 3027, 2961, 2868, 1497, 1400, 1245, 1144, 1004, 814, 747, 707, 499 cm<sup>-1</sup>. <sup>1</sup>H NMR (400 MHz, CDCl<sub>3</sub>):  $\delta$  7.58-7.52 (m, 4H), 7.30 (d,  $J = 7.6$  Hz, 4H), 3.77 (t,  $J = 7.4$  Hz, 2H), 3.13 (t,  $J = 7.4$  Hz, 2H), 2.72 (q, 2.72,  $J = 7.6$  Hz, 2H), 1.31 (t,  $J = 7.6$  Hz, 3H). <sup>13</sup>C NMR (100 MHz, CDCl<sub>3</sub>):  $\delta$  143.4, 139.9, 138.2, 136.8, 129.2, 128.3, 127.2, 127.0, 45.00, 38.9, 28.6, 15.7. GC-MS ( $m/z$ ): 244 (M<sup>+</sup>), 229 (M<sup>+</sup>-CH<sub>3</sub>), 195 (M<sup>+</sup>-CH<sub>2</sub>Cl). HRMS (EI): calcd. For C<sub>16</sub>H<sub>17</sub>Cl (M<sup>+</sup>): 244.1019, found: 244.1013.

## 6. References

1. Saint-Jalmes, L. *J. Fluorine Chem.* **2006**, *127*, 85–90.
2. Xiao, Y.; Min, Q.; Xu, C.; Wang, R.; Zhang, X. *Angew. Chem., Int. Ed.* **2016**, *55*, 5837–5841.
3. An, L.; Xiao, Y.-L.; Zhang, S.; Zhang, X. *Angew. Chem., Int. Ed.* **2018**, *57*, 6921–6925.
4. Li, X.; Zhao, J.; Wang, Y.; Rong, J.; Hu, M.; Chen, D.; Hu, J. *Chem. — Asian J.* **2016**, *11*, 1789–1792.
5. Gu, J.; Guo, W.; Zhang, X. *Org. Chem. Front.* **2015**, *2*, 38–41.
6. Li, L.; Ni, C.; Xie, Q.; Hu, M.; Wang, F.; Hu, J. *Angew. Chem., Int. Ed.* **2017**, *56*, 9971–9975.
7. Pan, F.; Boursalian, G.; Ritter, T. *Angew. Chem., Int. Ed.* **2018**, *57*, 16871–16876.
8. Yang, Y.; Cai, J.; Luo, G.; Tong, X.; Su, Y.; Jiang, Y.; Li, C. *Tetrahedron.* **2019**, *60*, 1130–1134.

## 7. $^1\text{H}$ , $^{19}\text{F}$ and $^{13}\text{C}$ NMR Spectra of Isolated Products

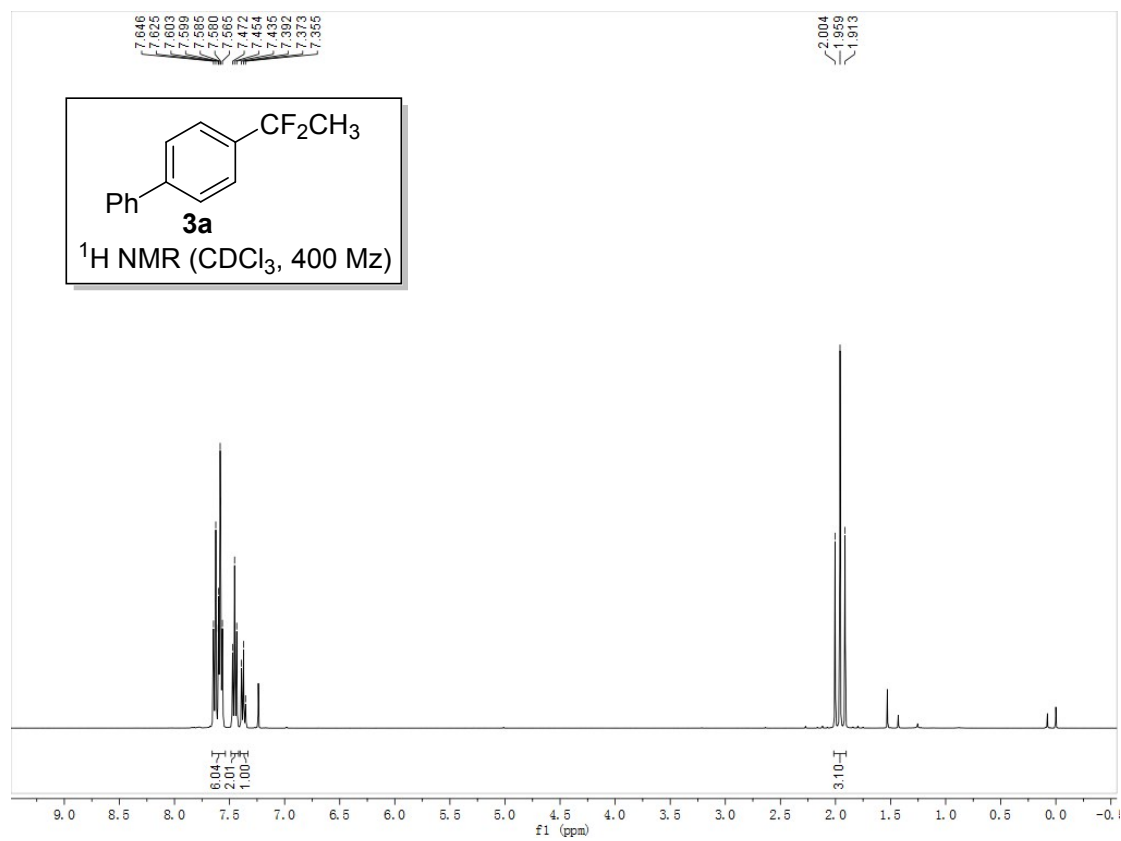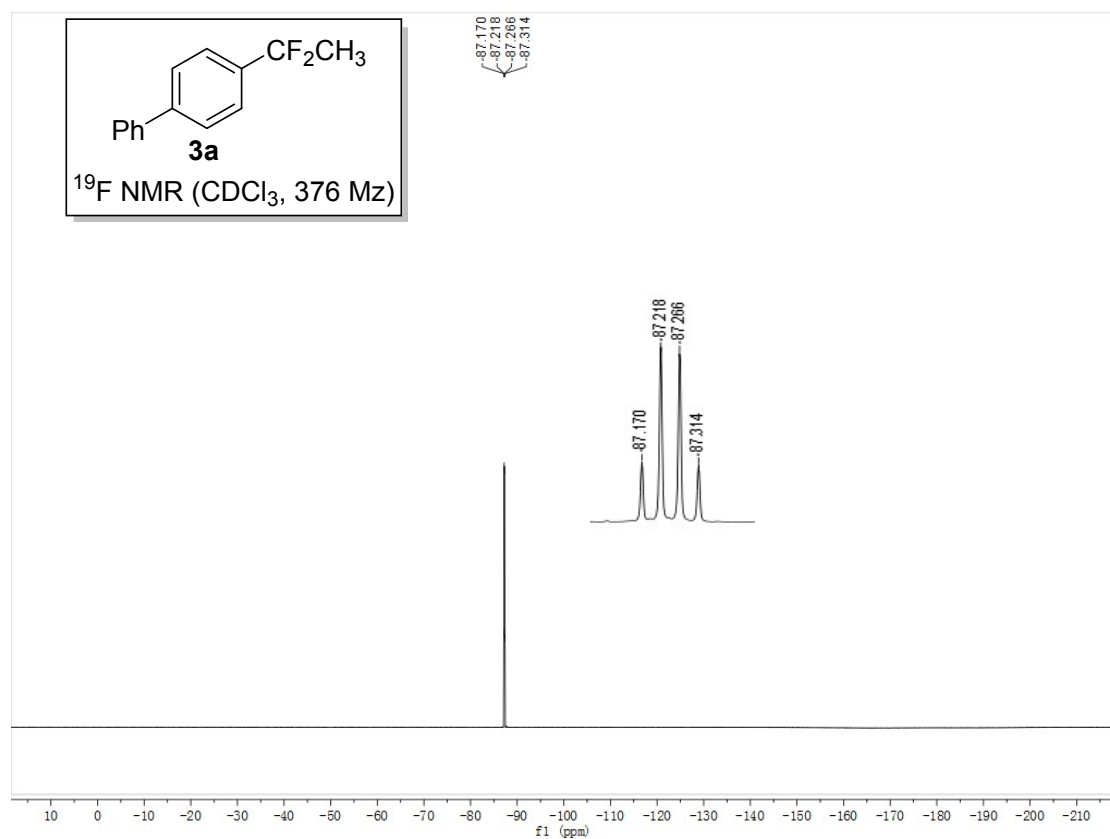

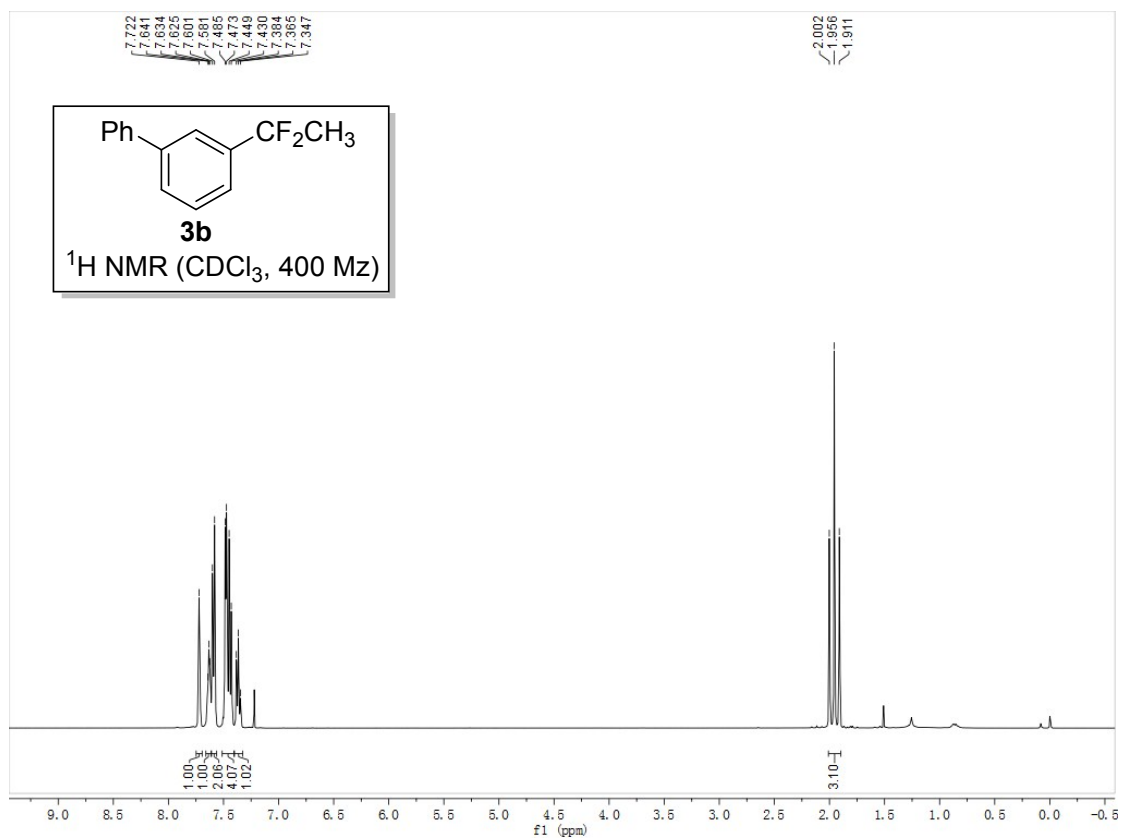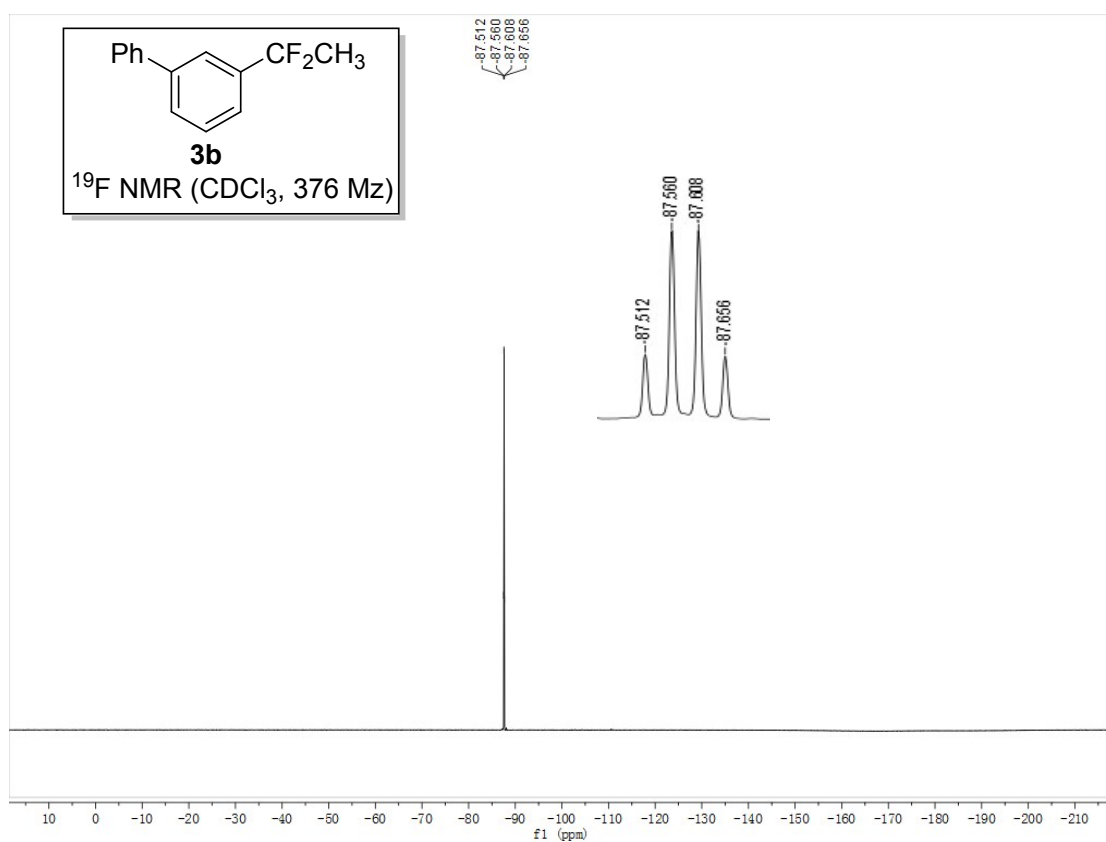

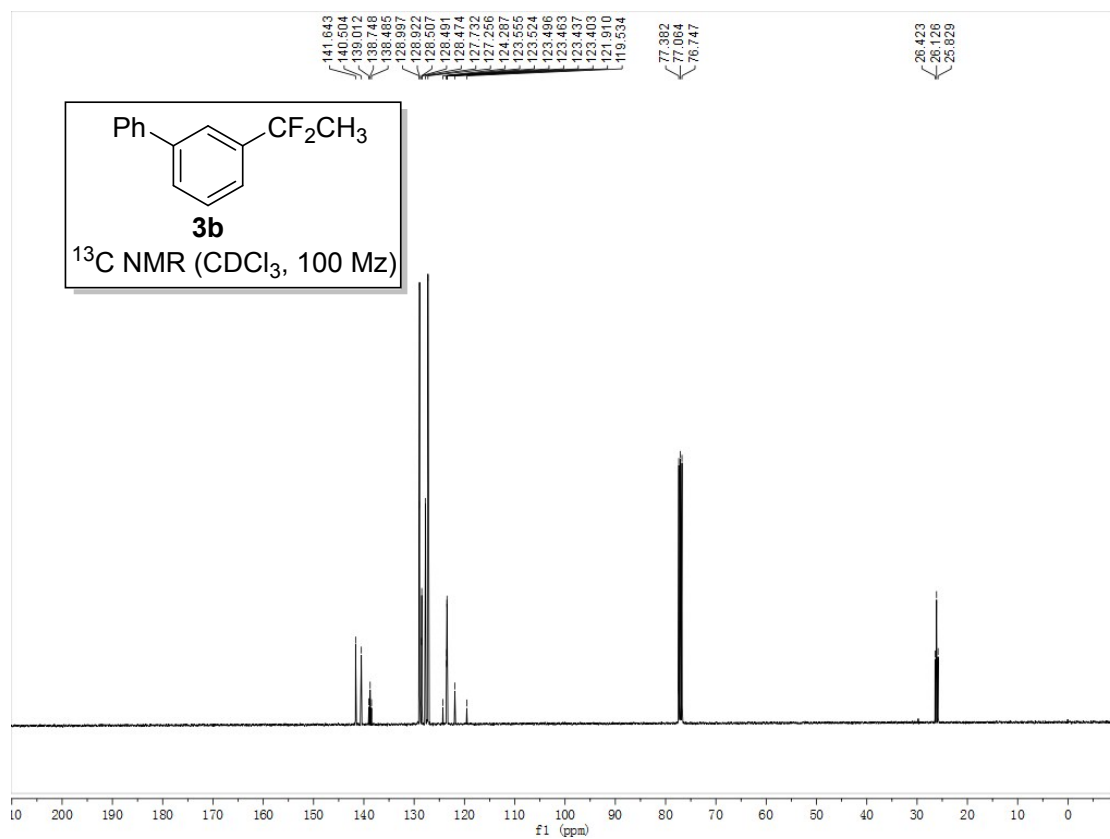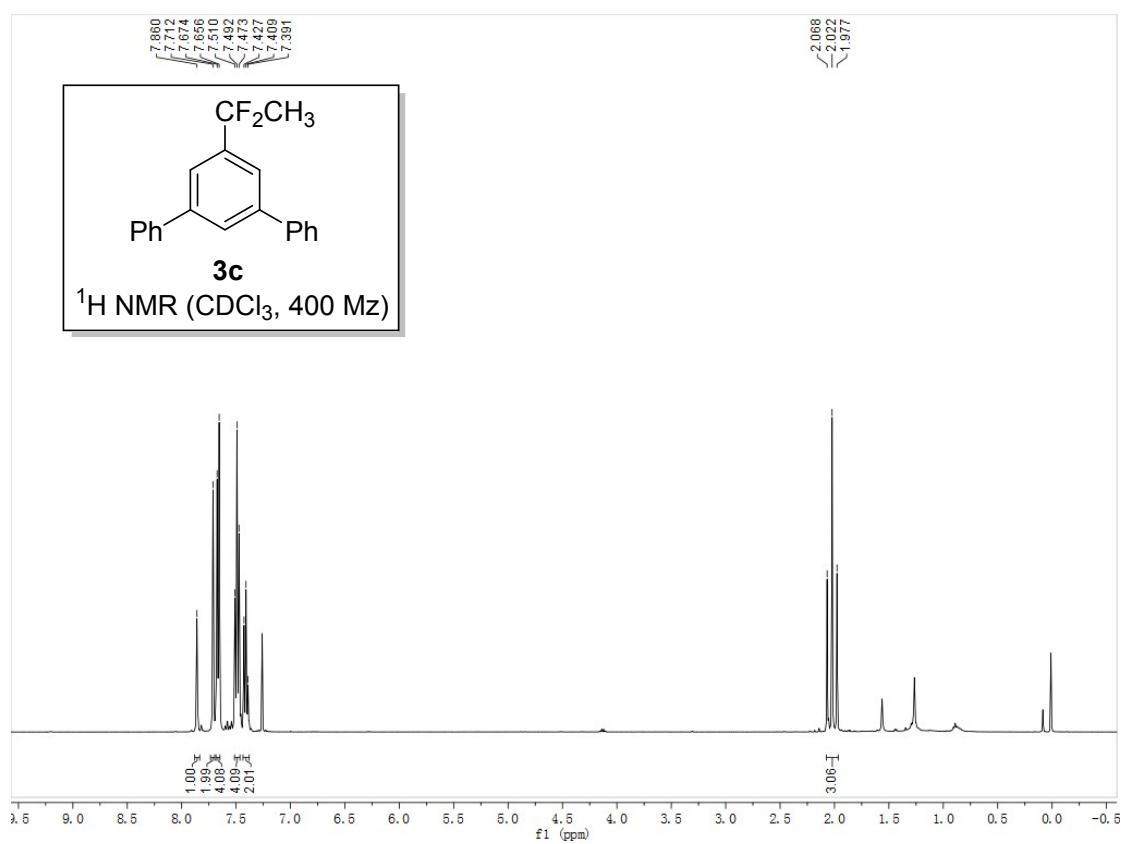

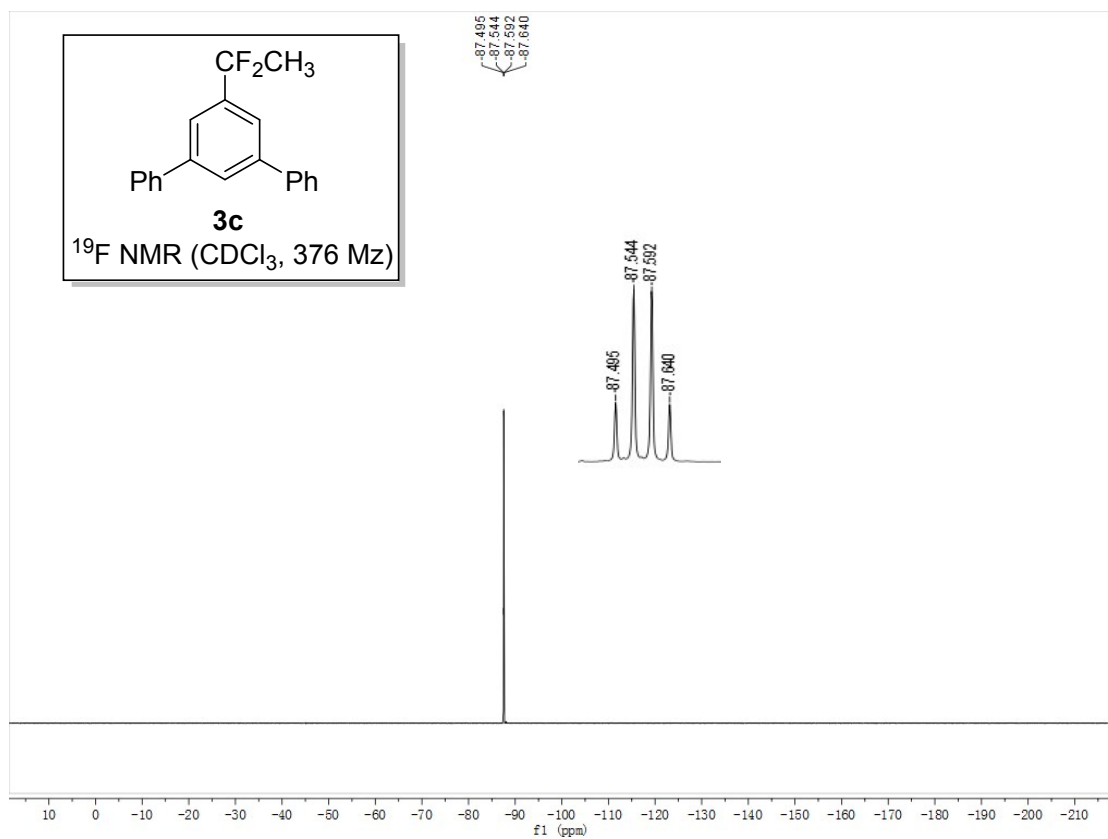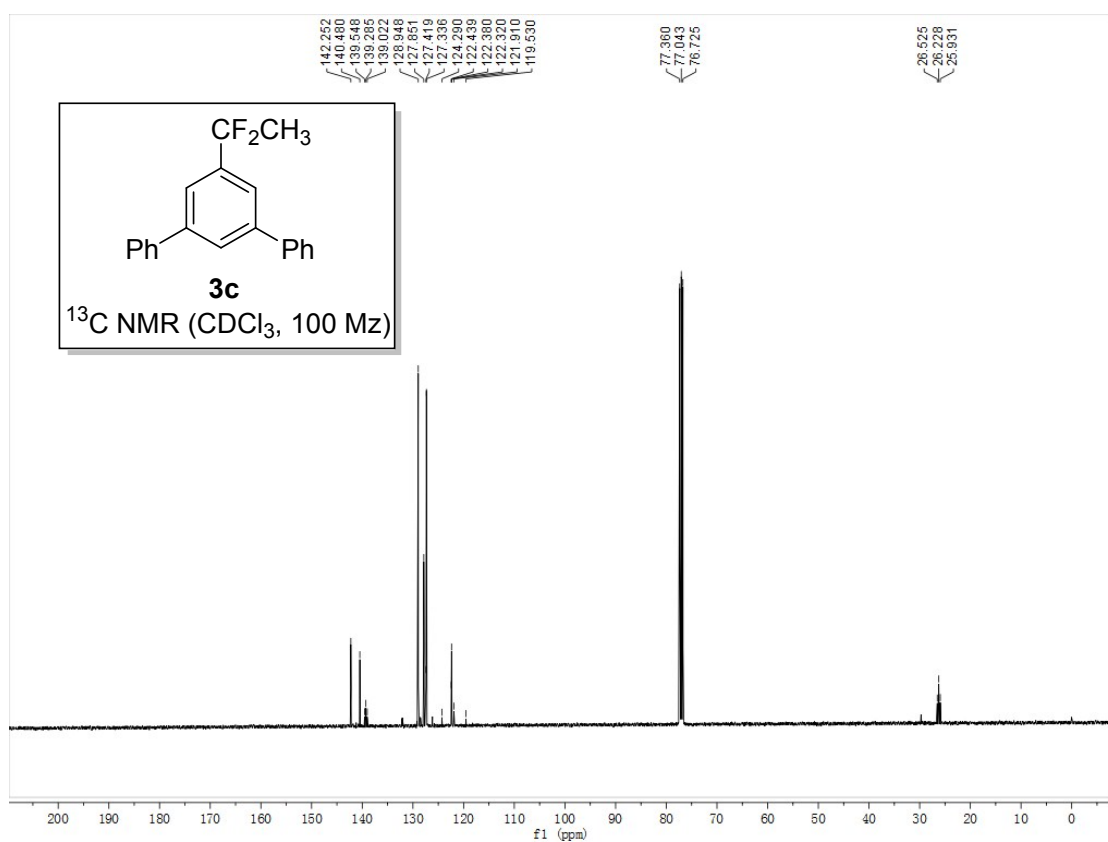

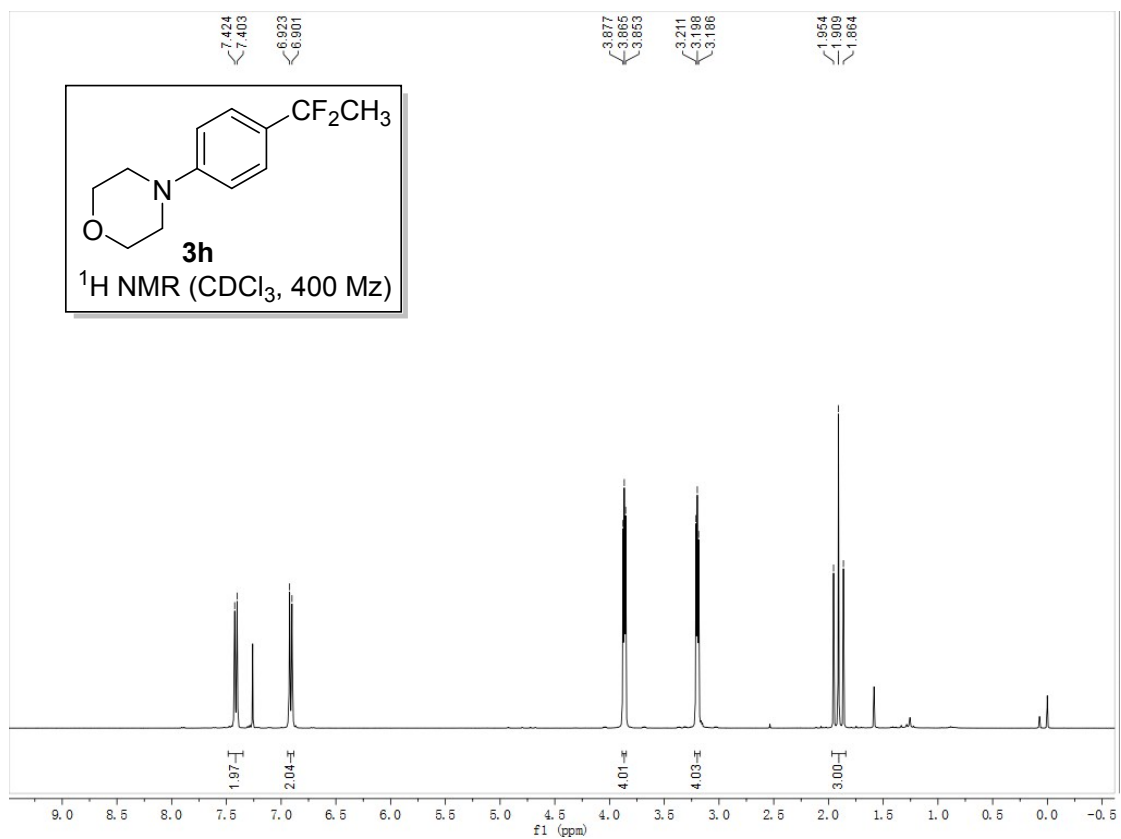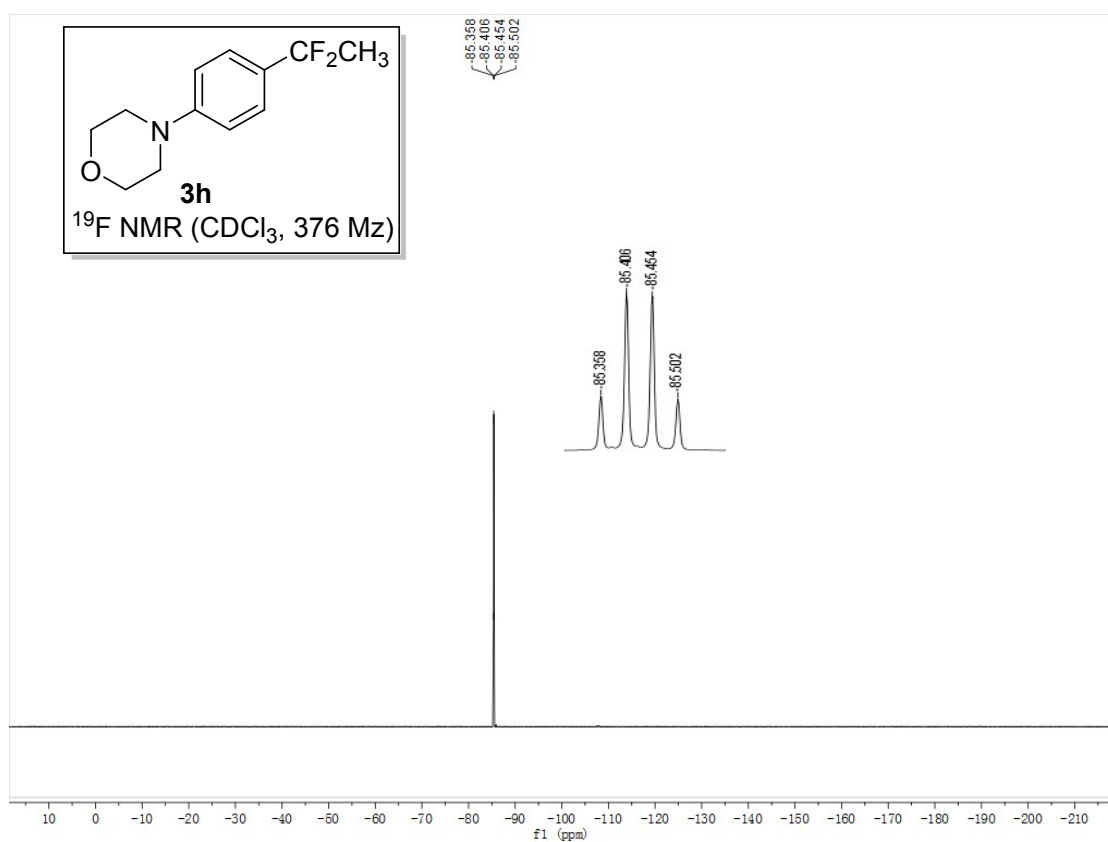



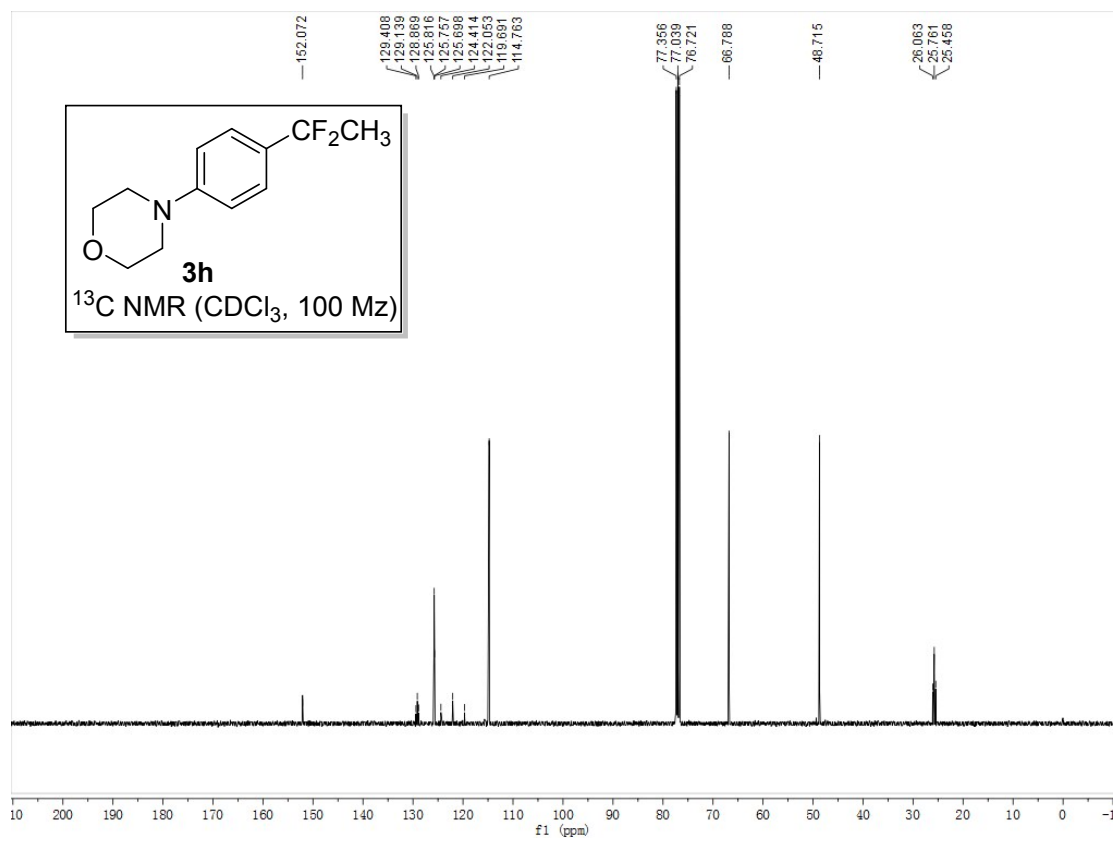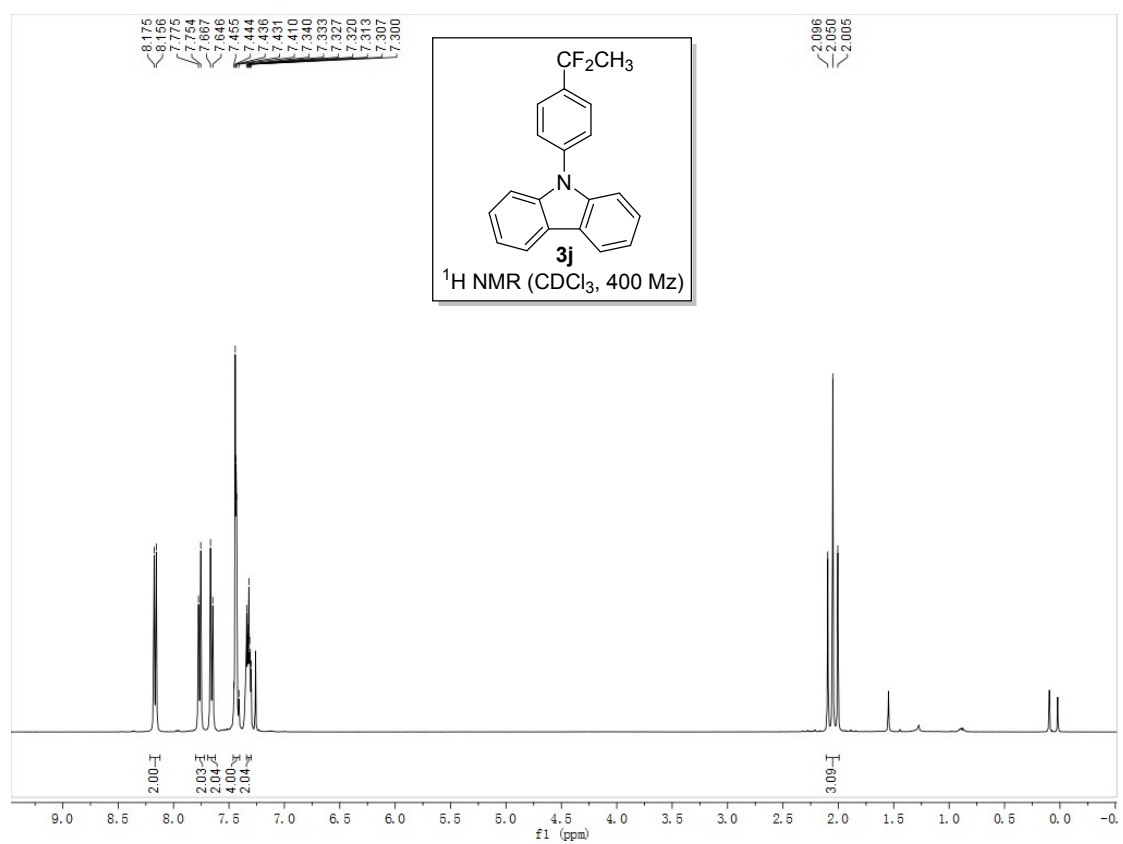

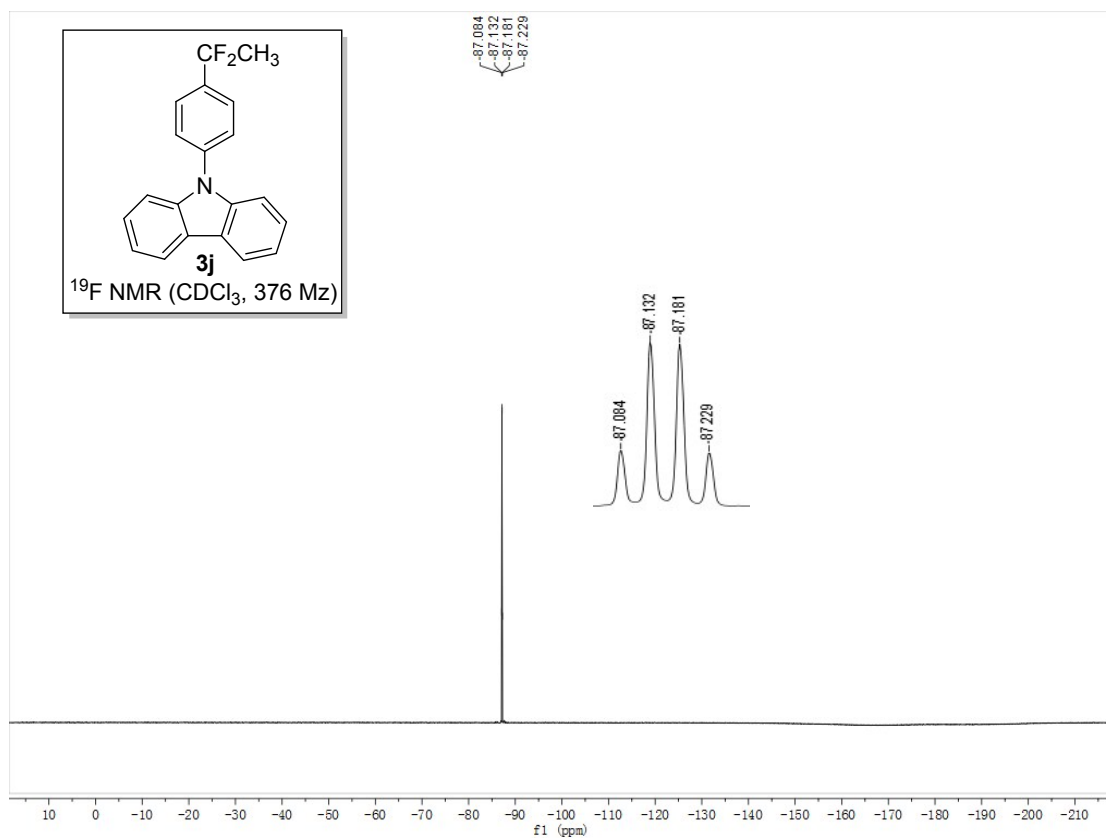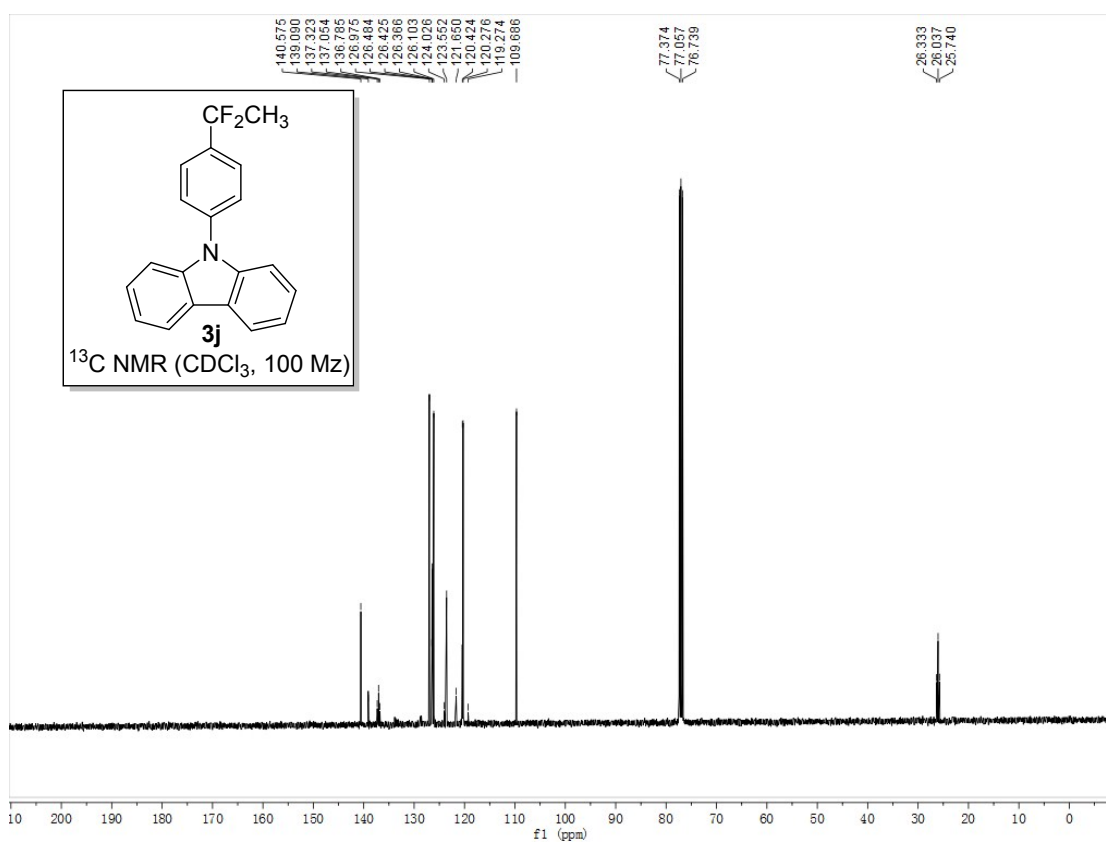

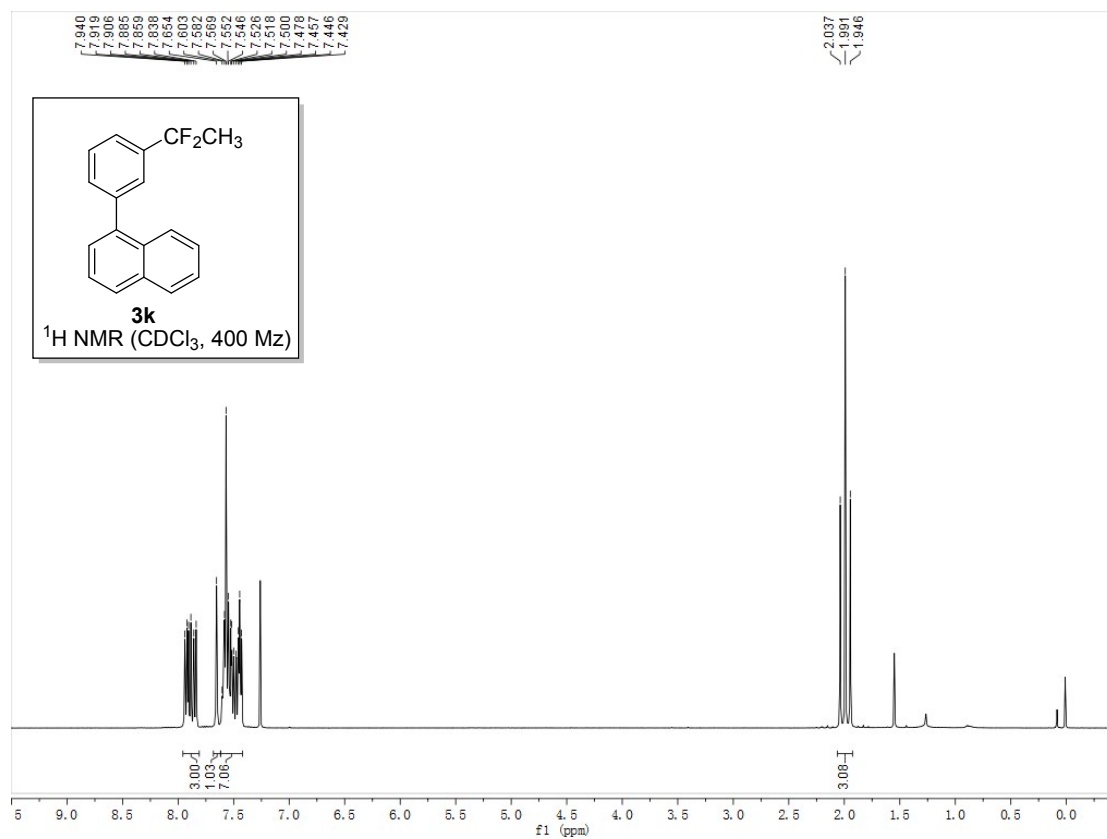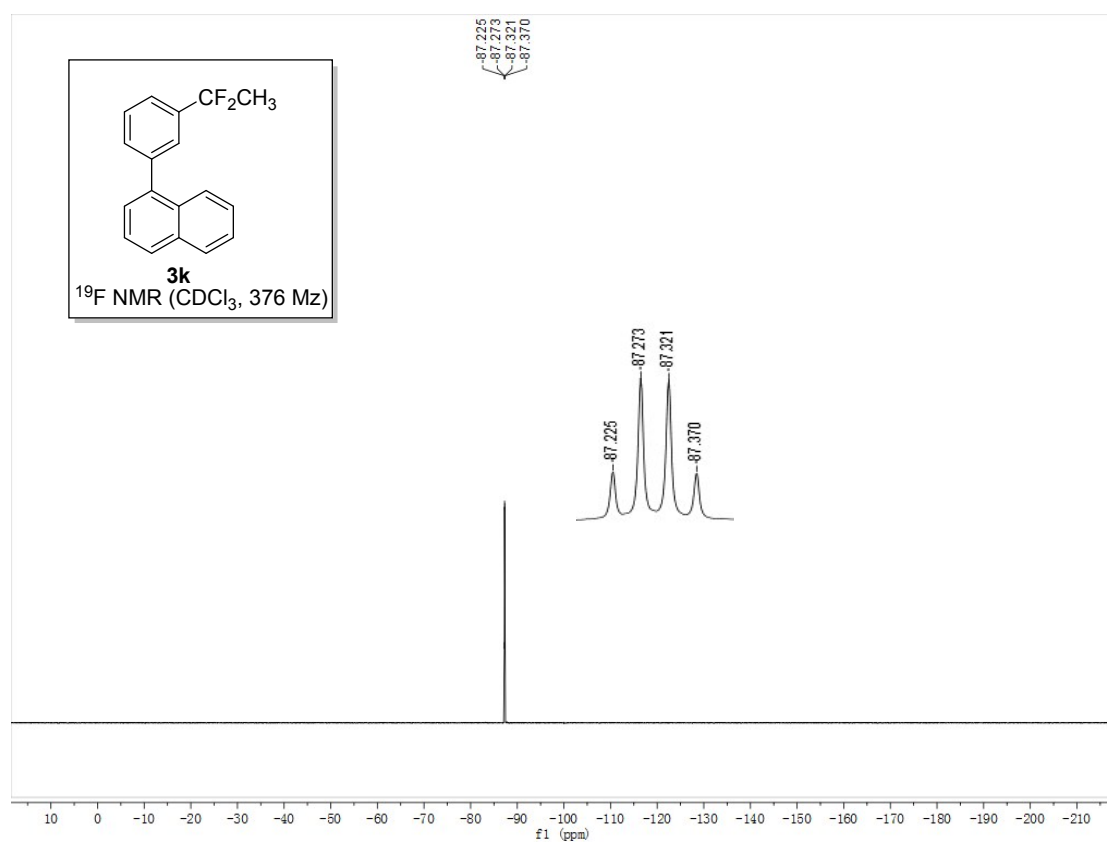

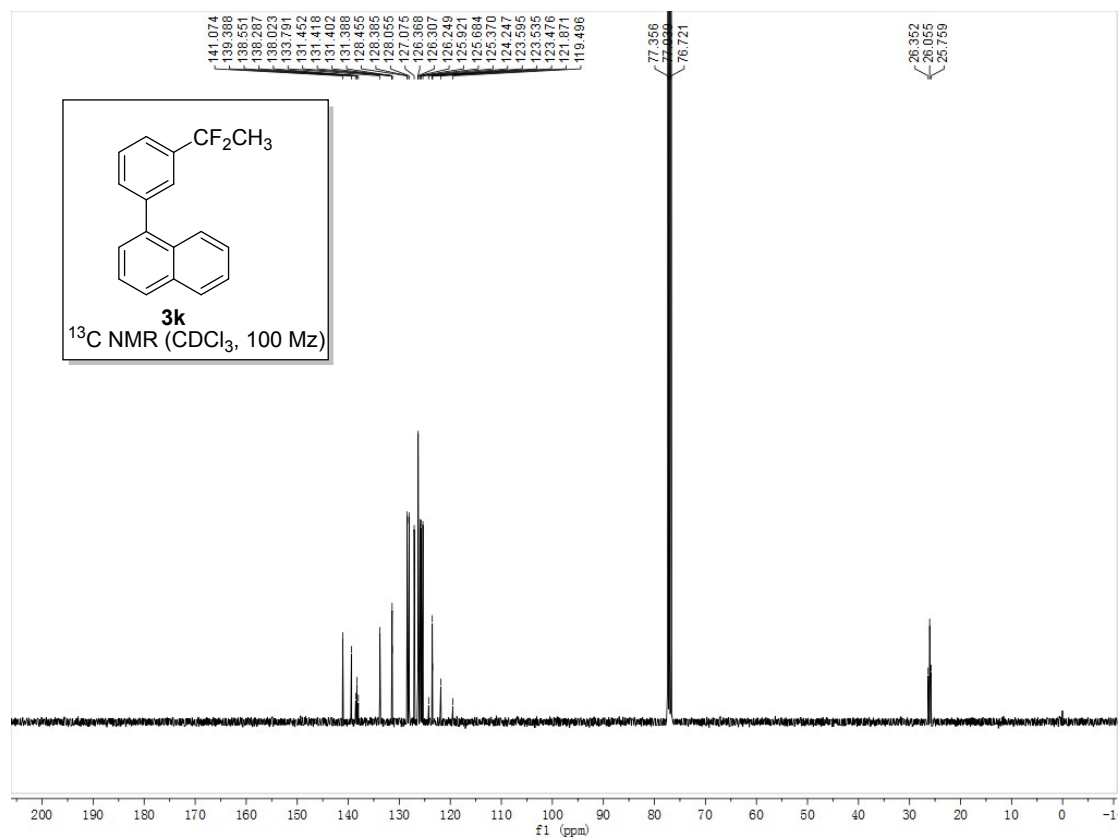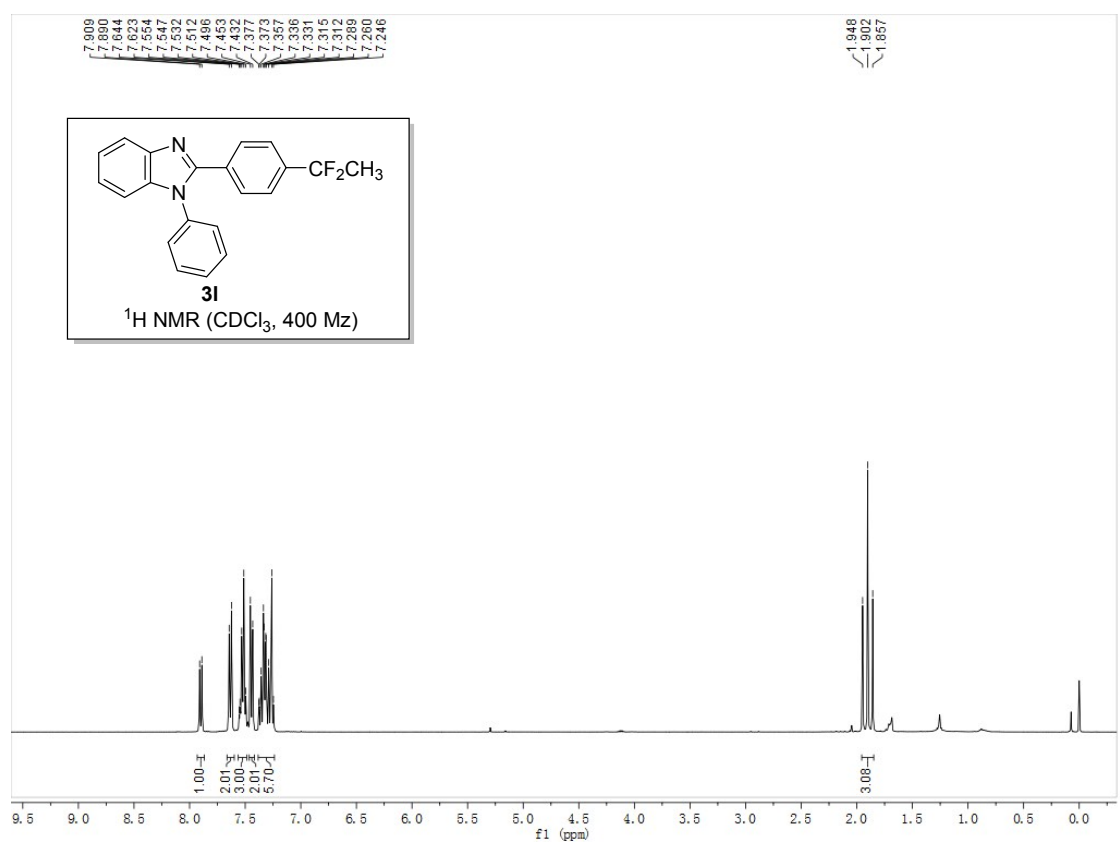

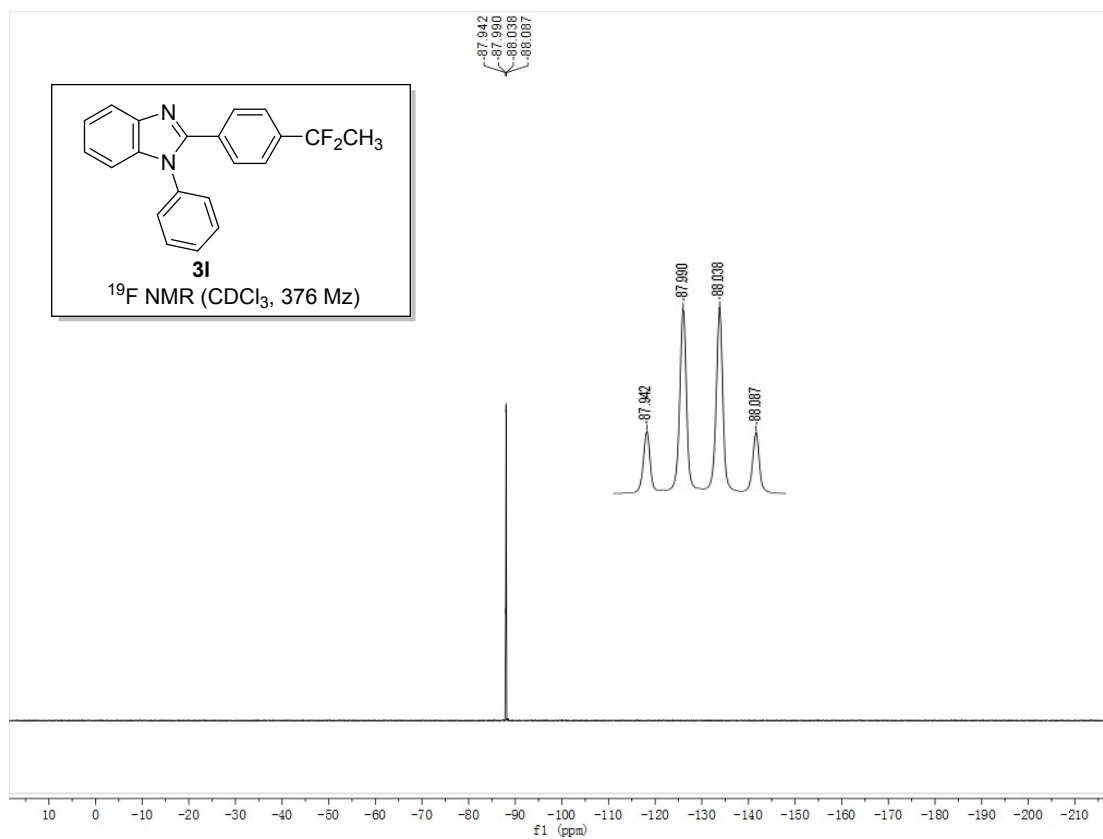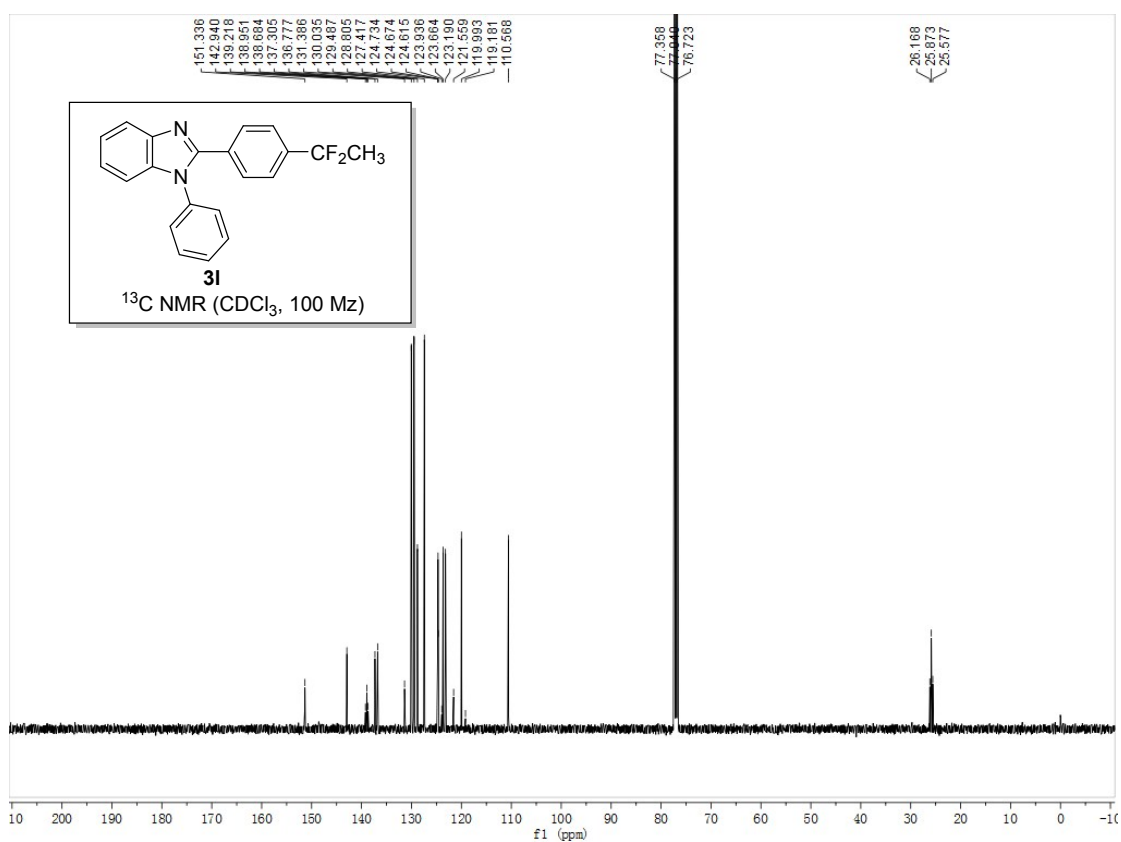

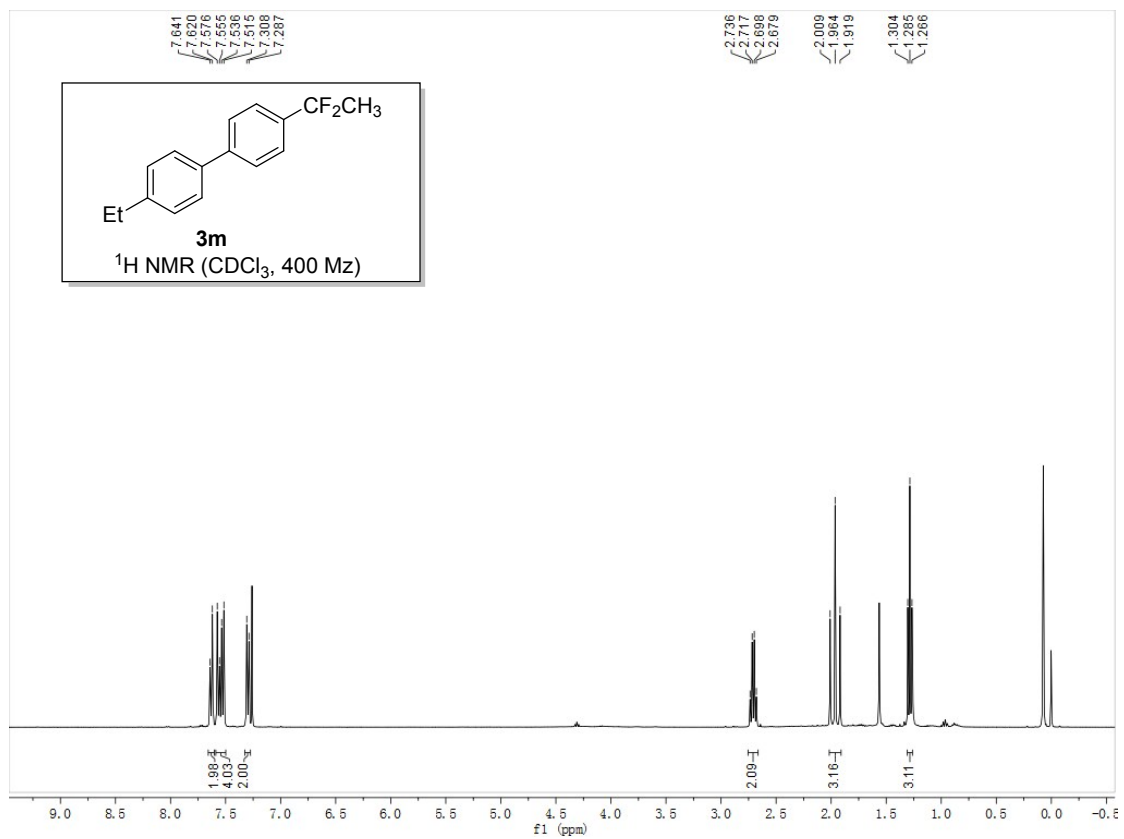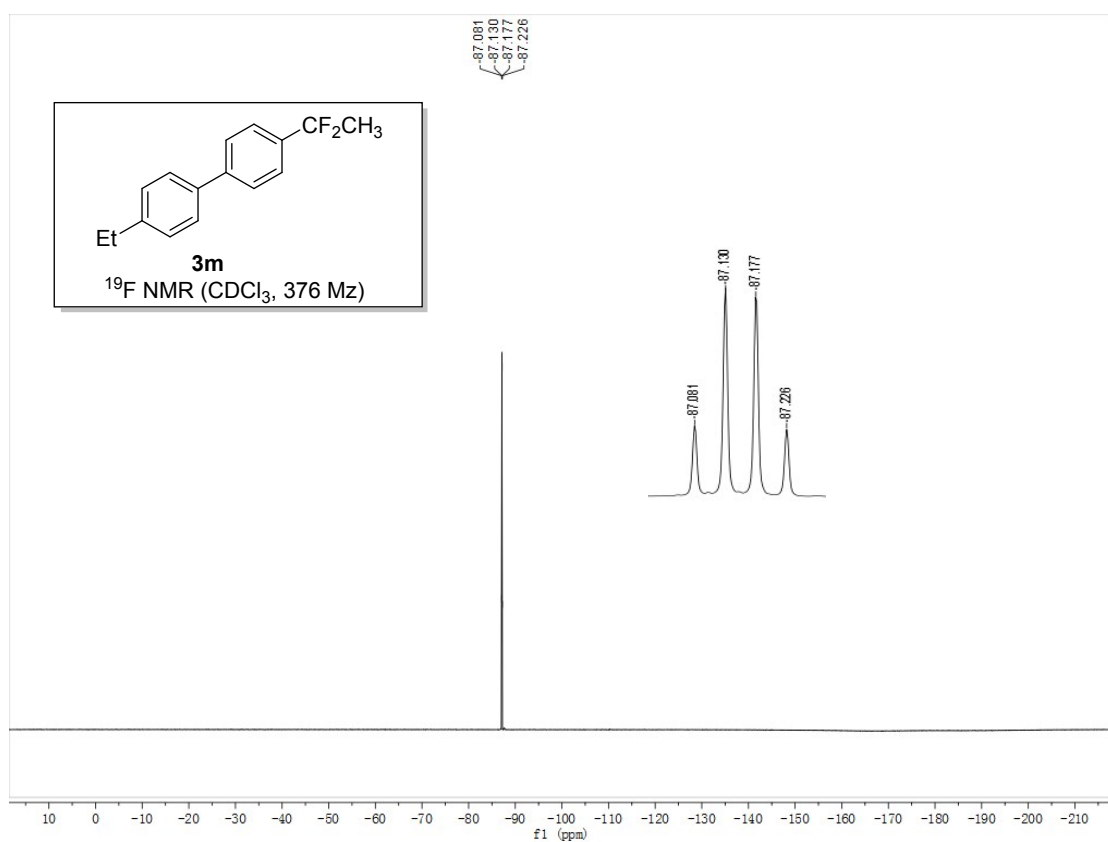

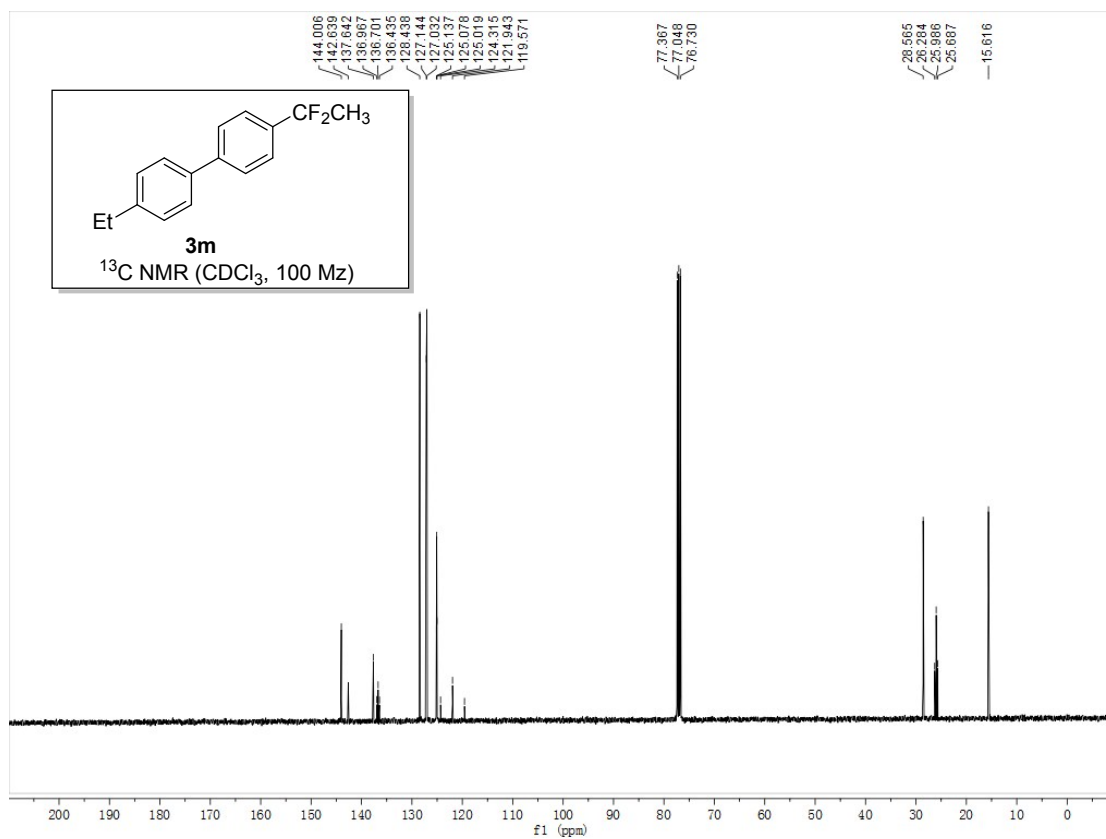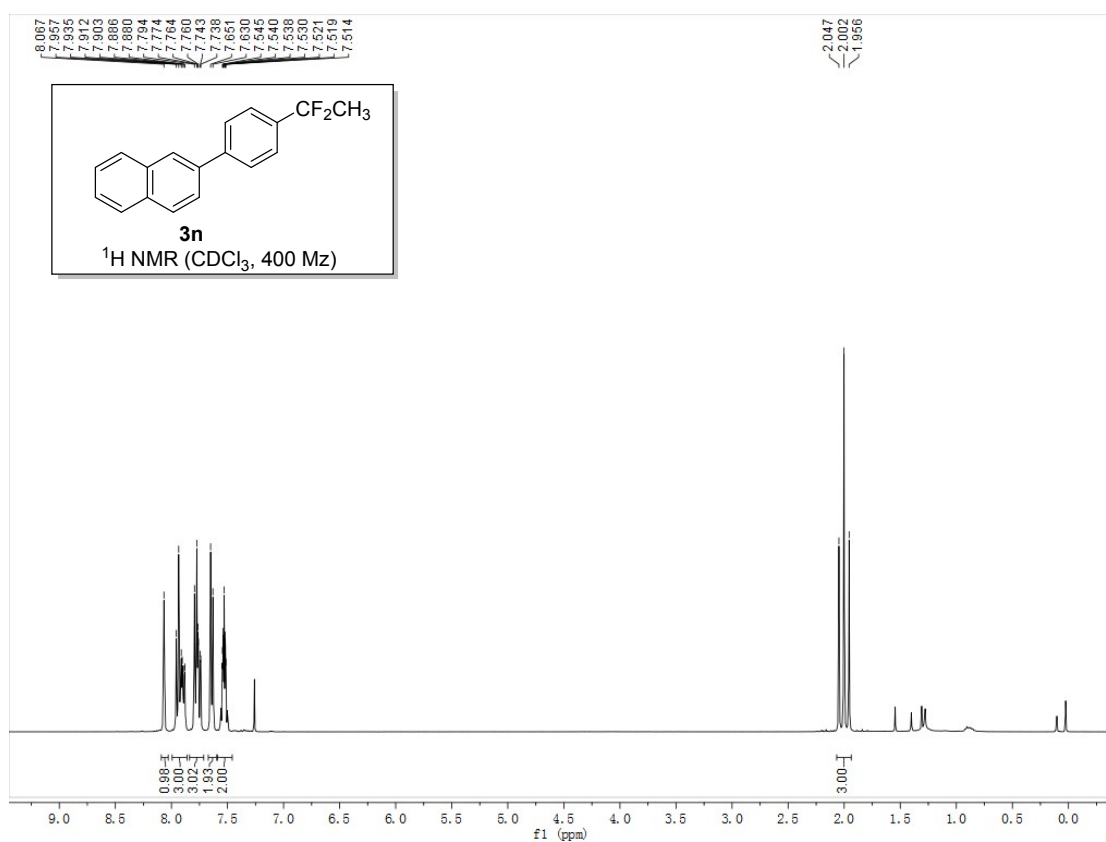

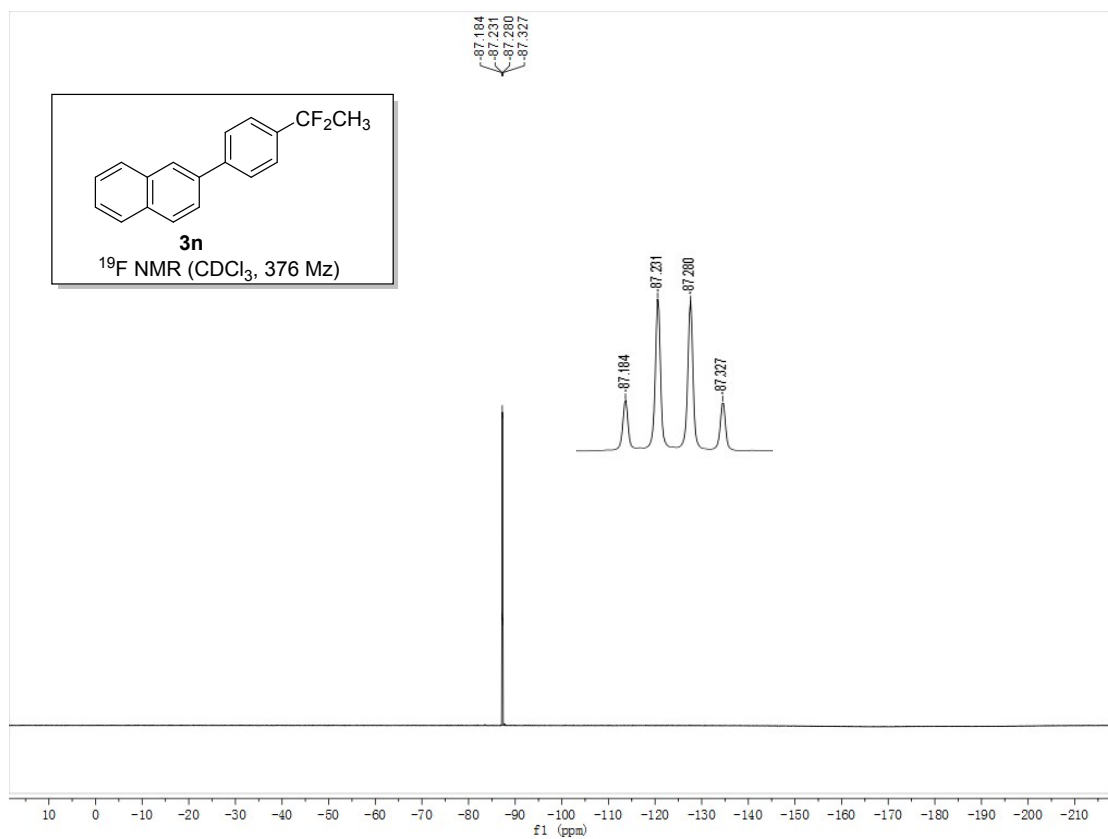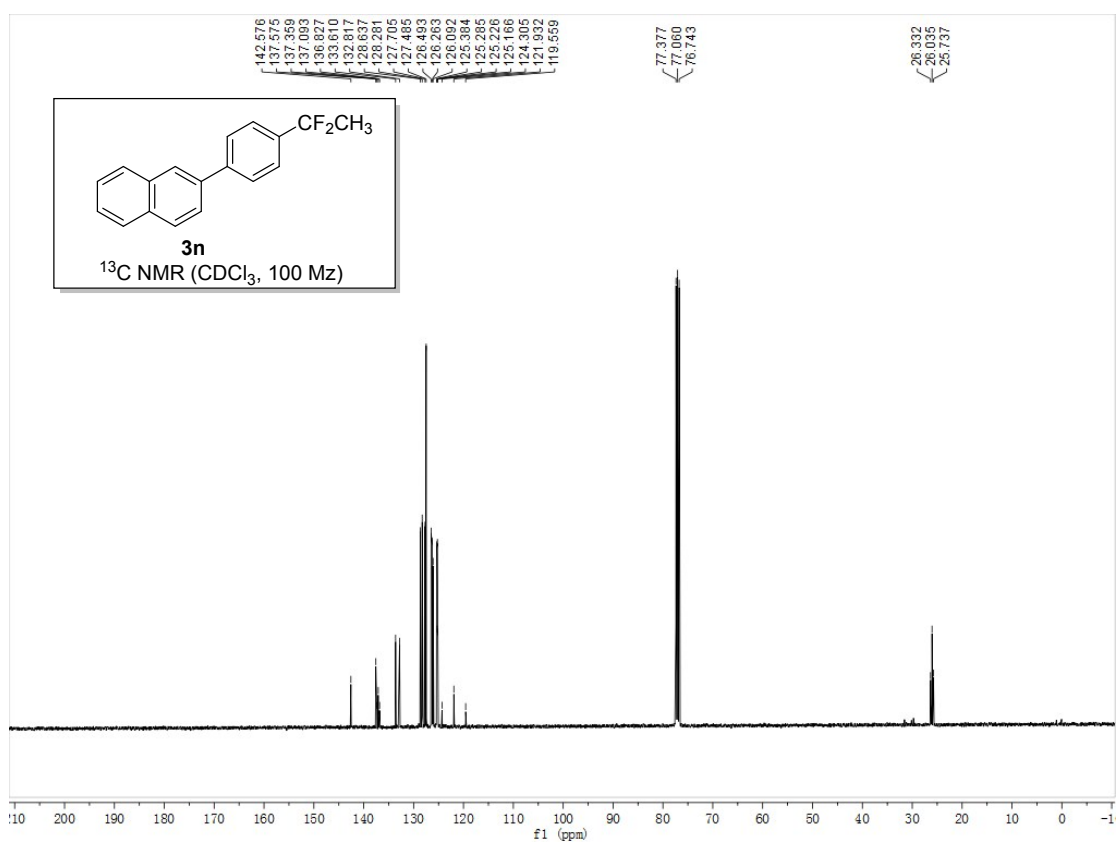



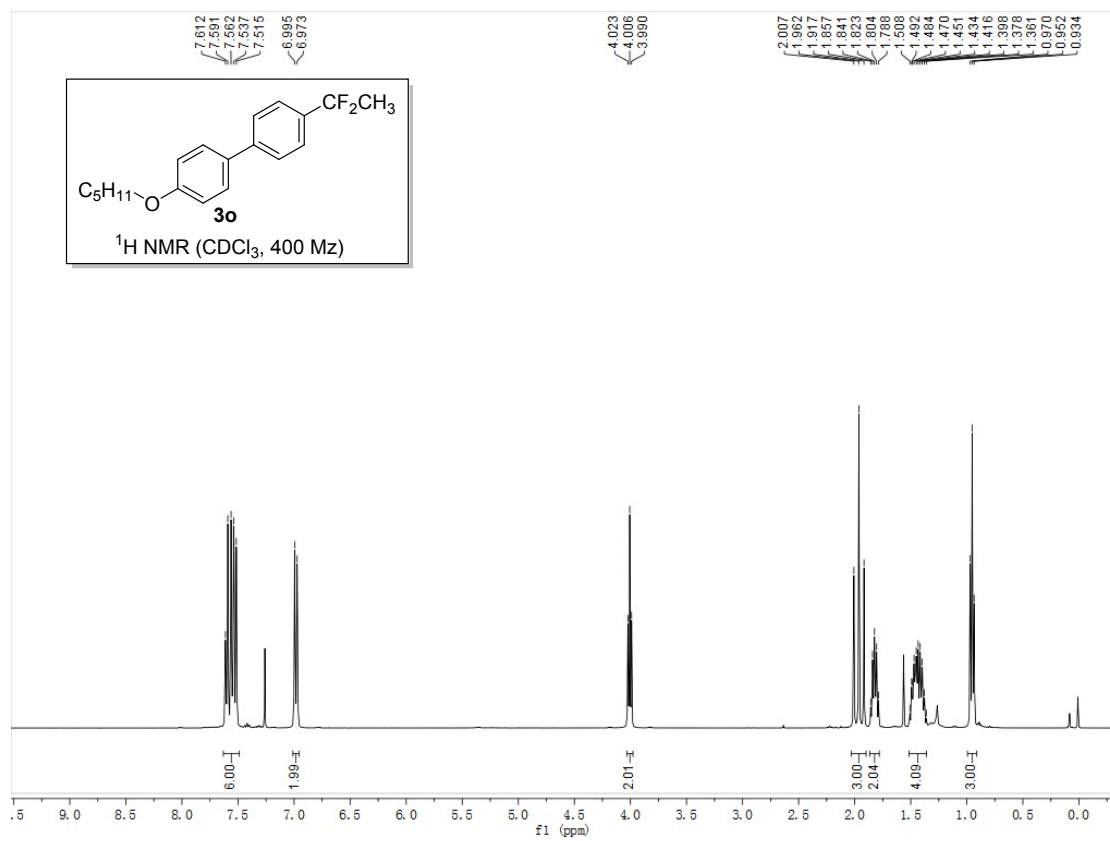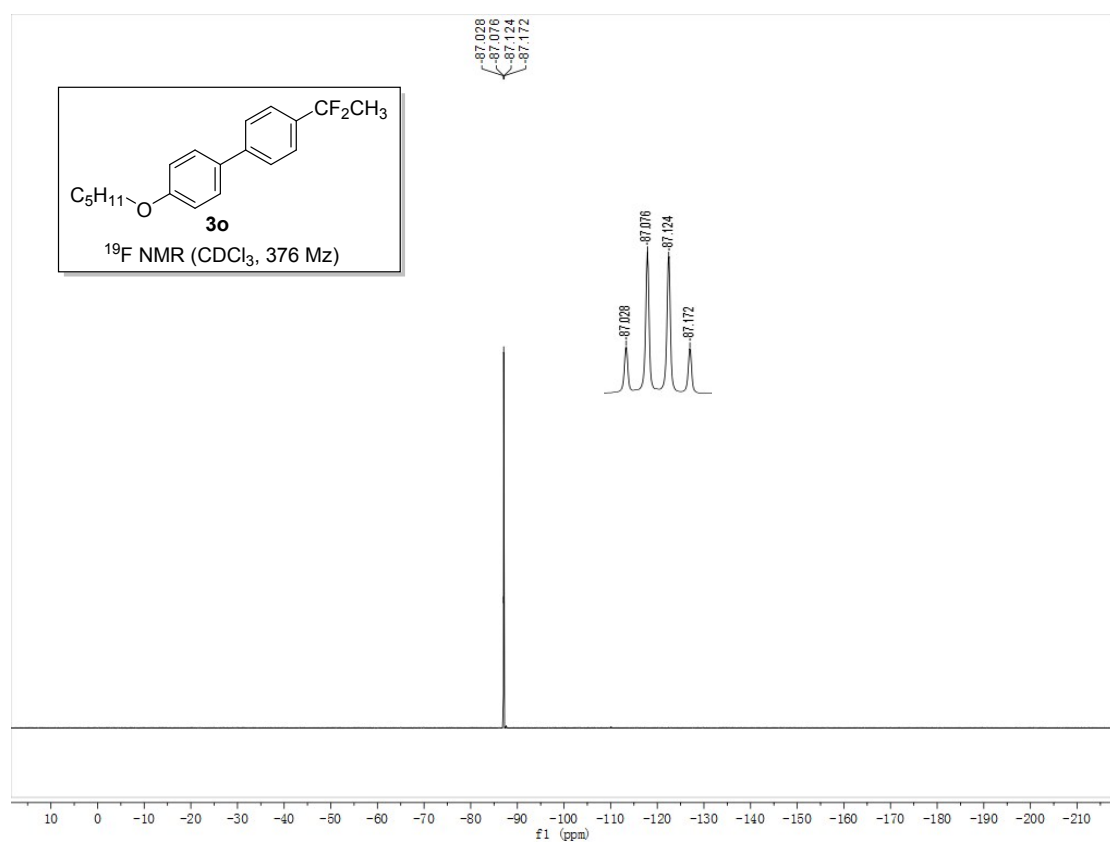

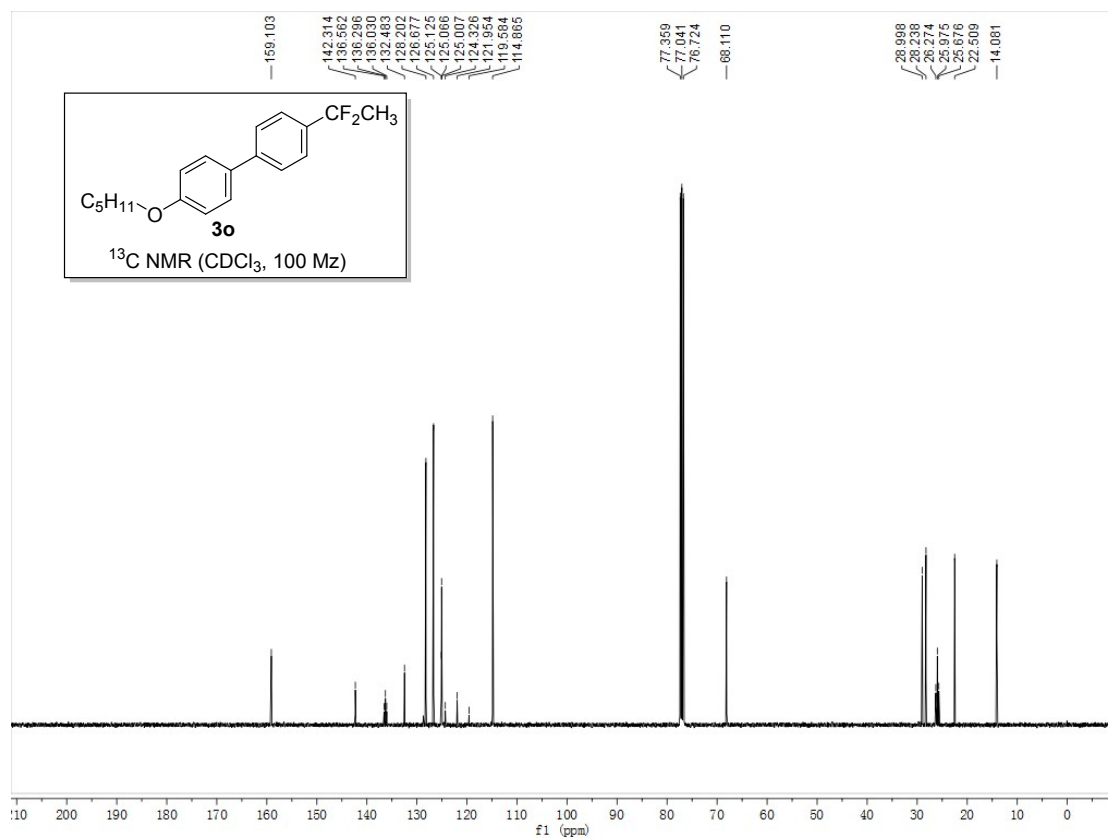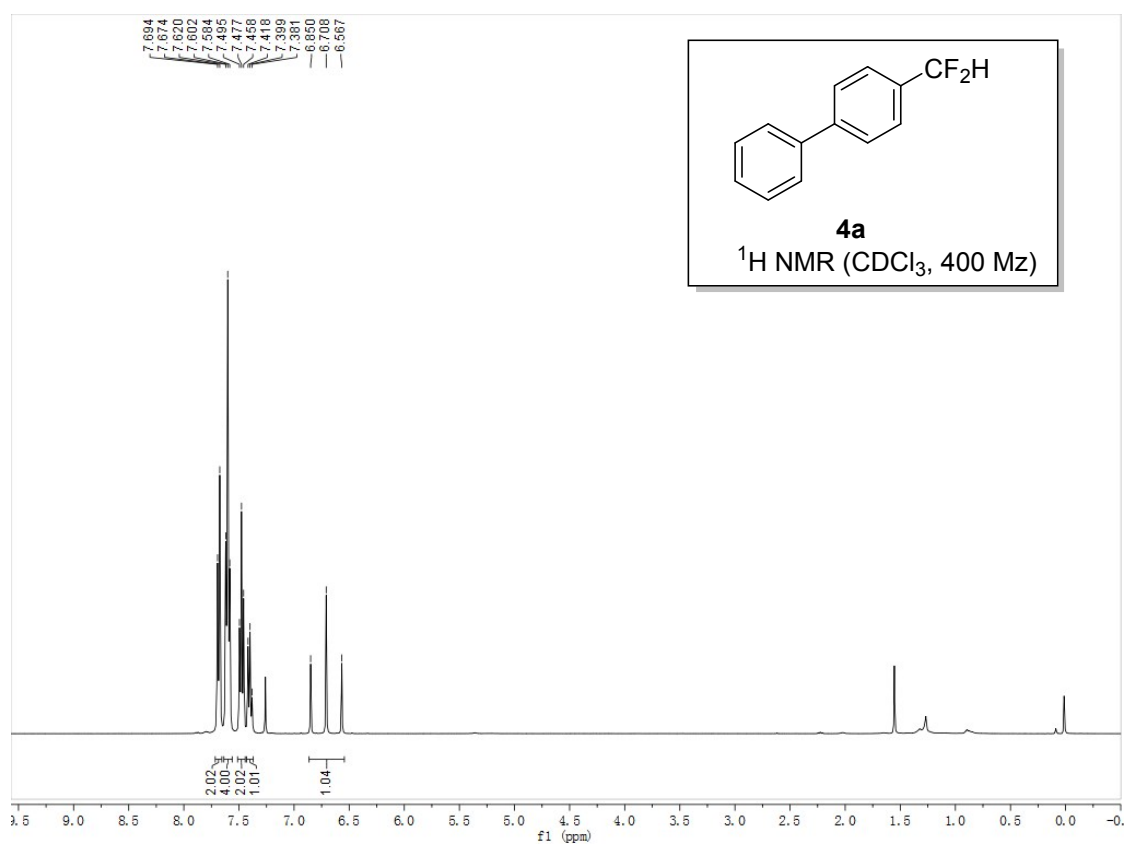

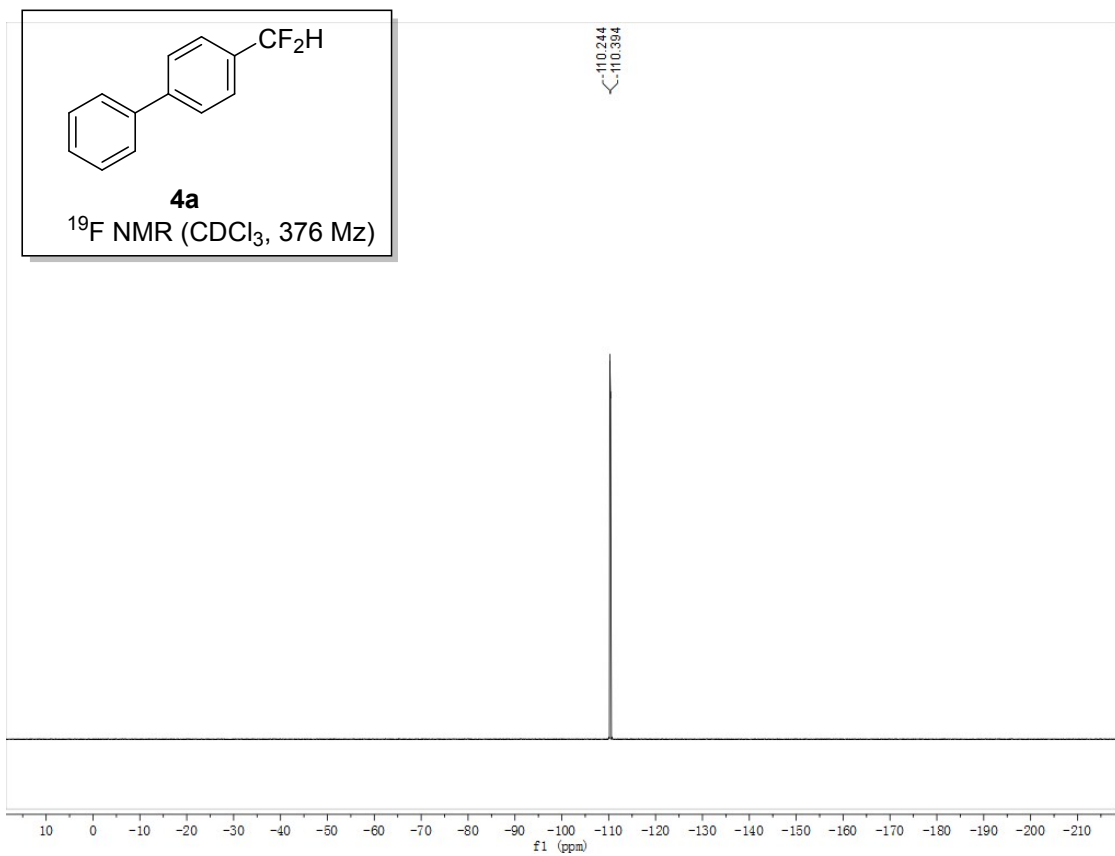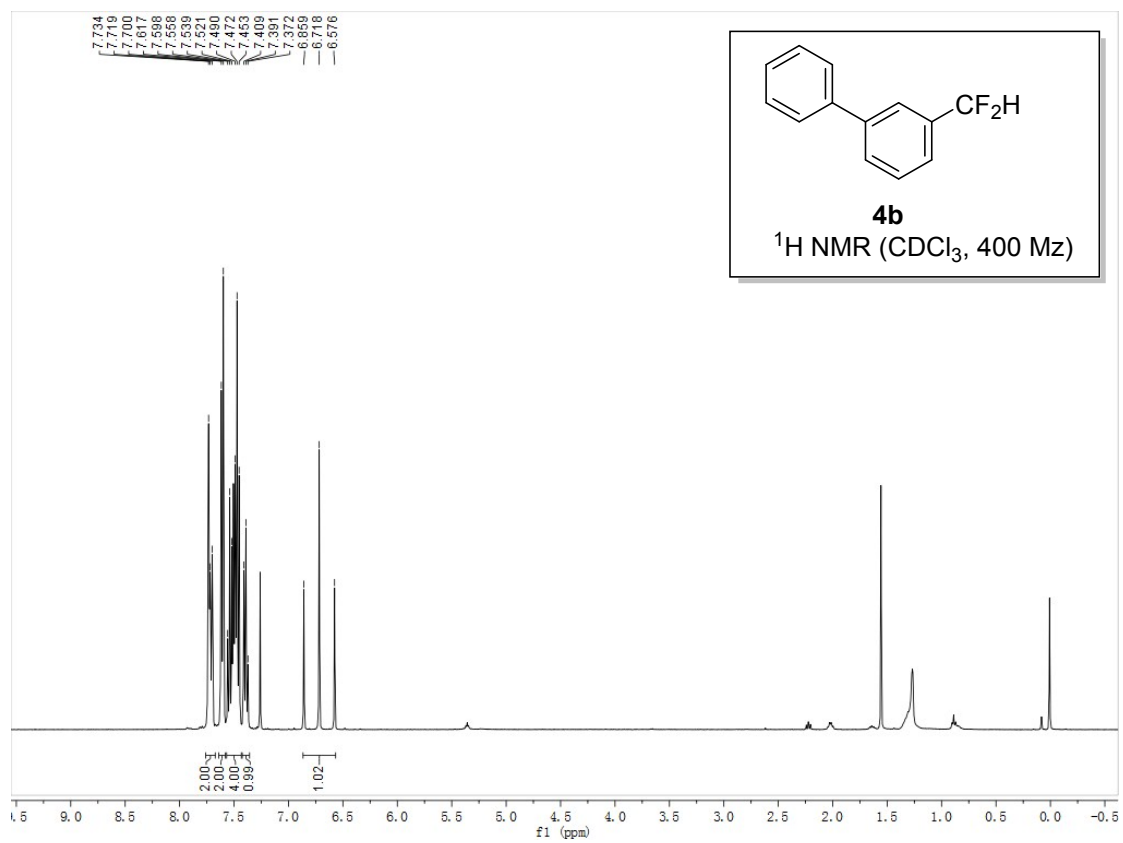

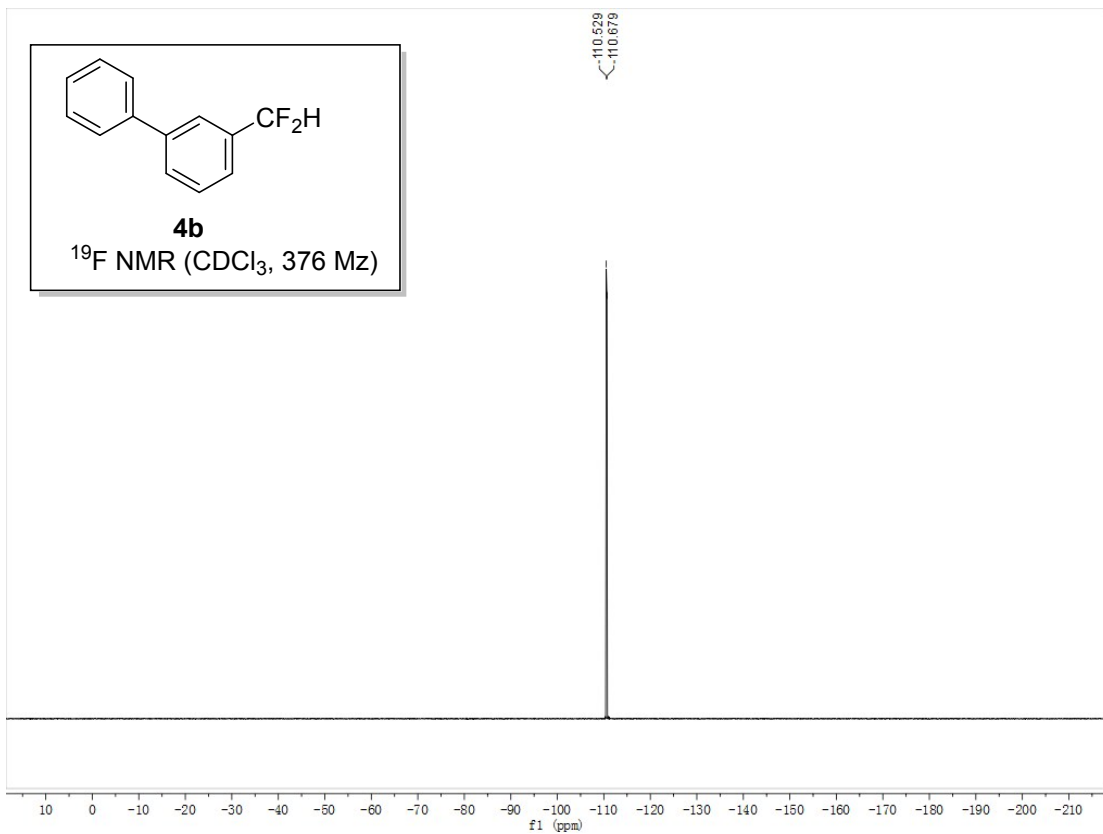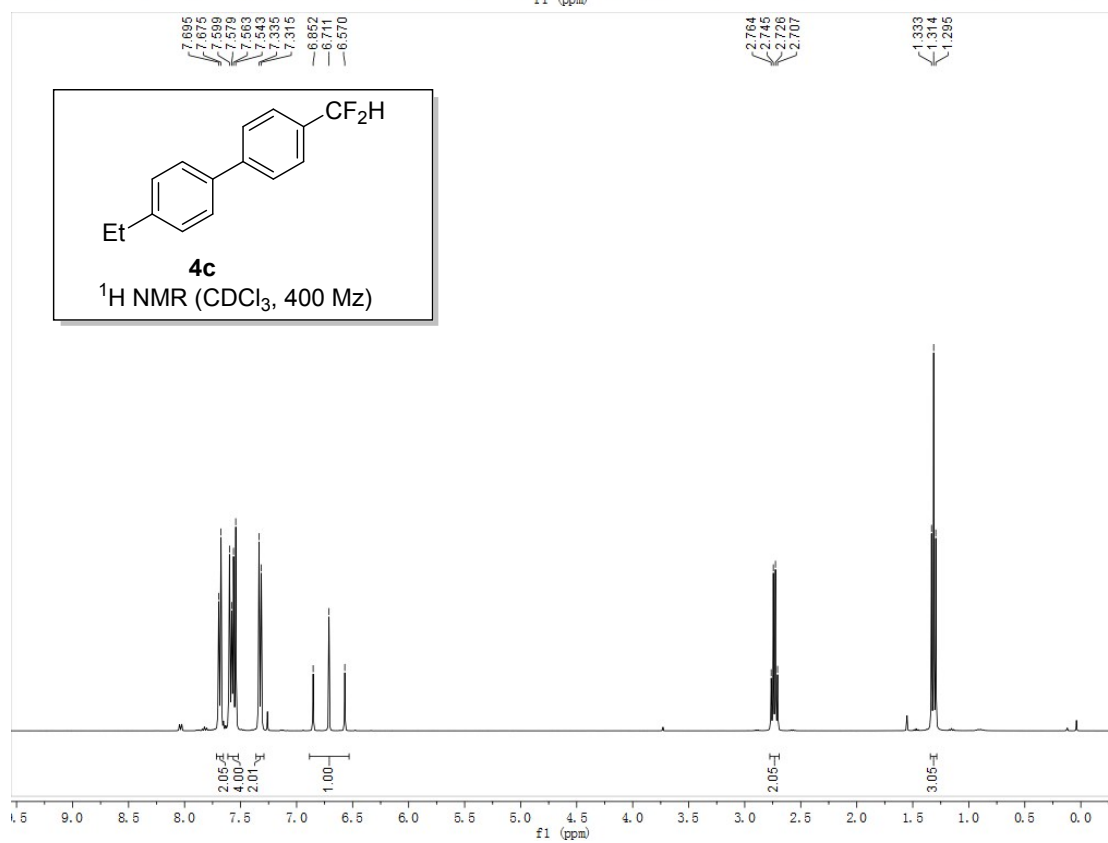

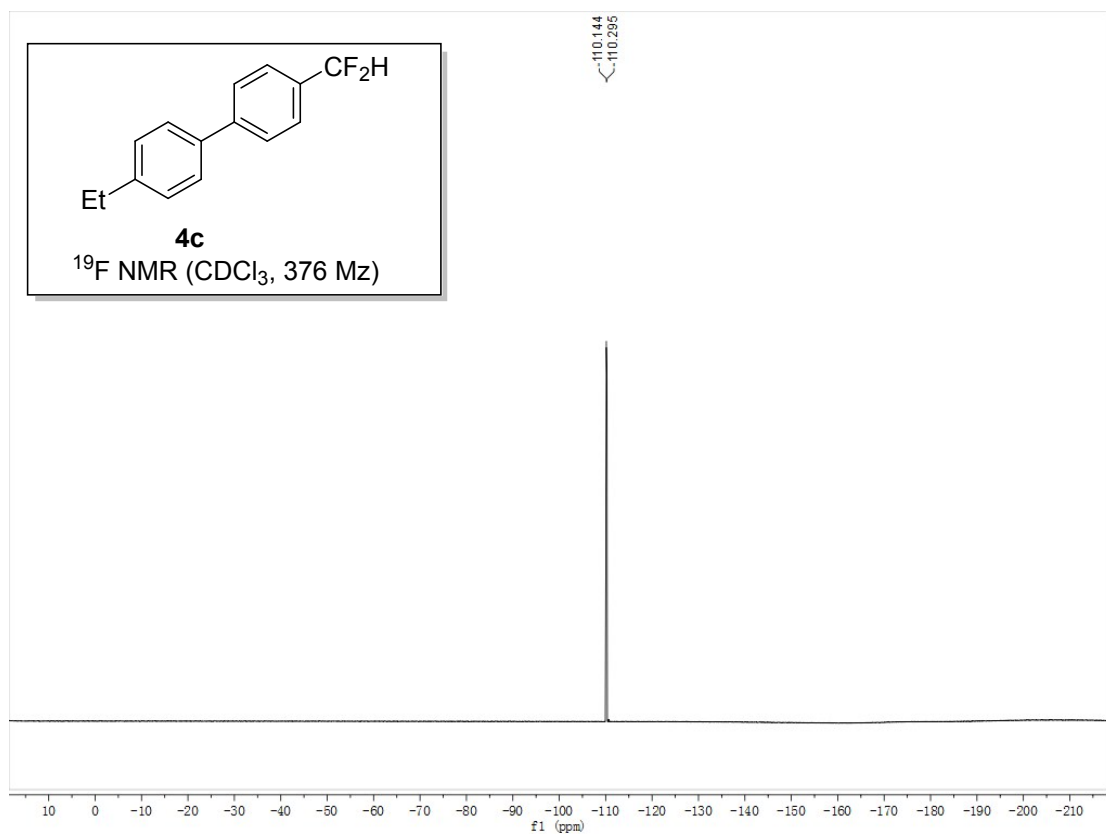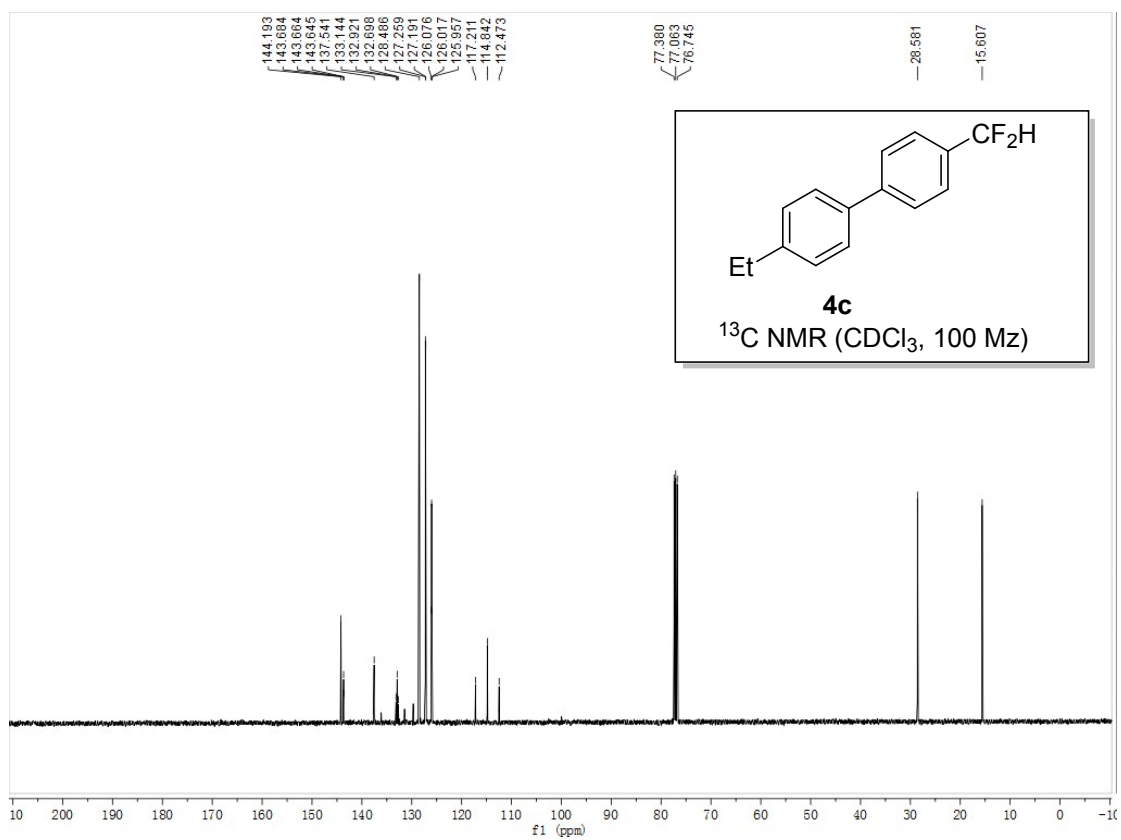

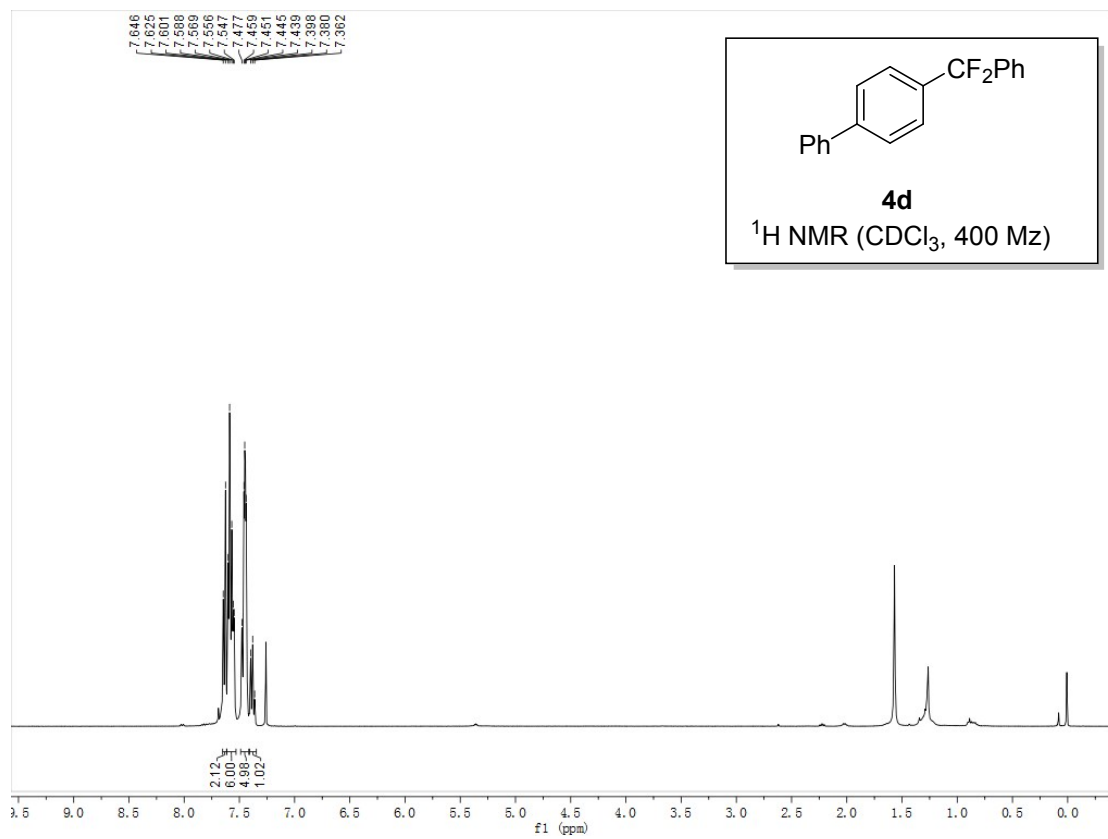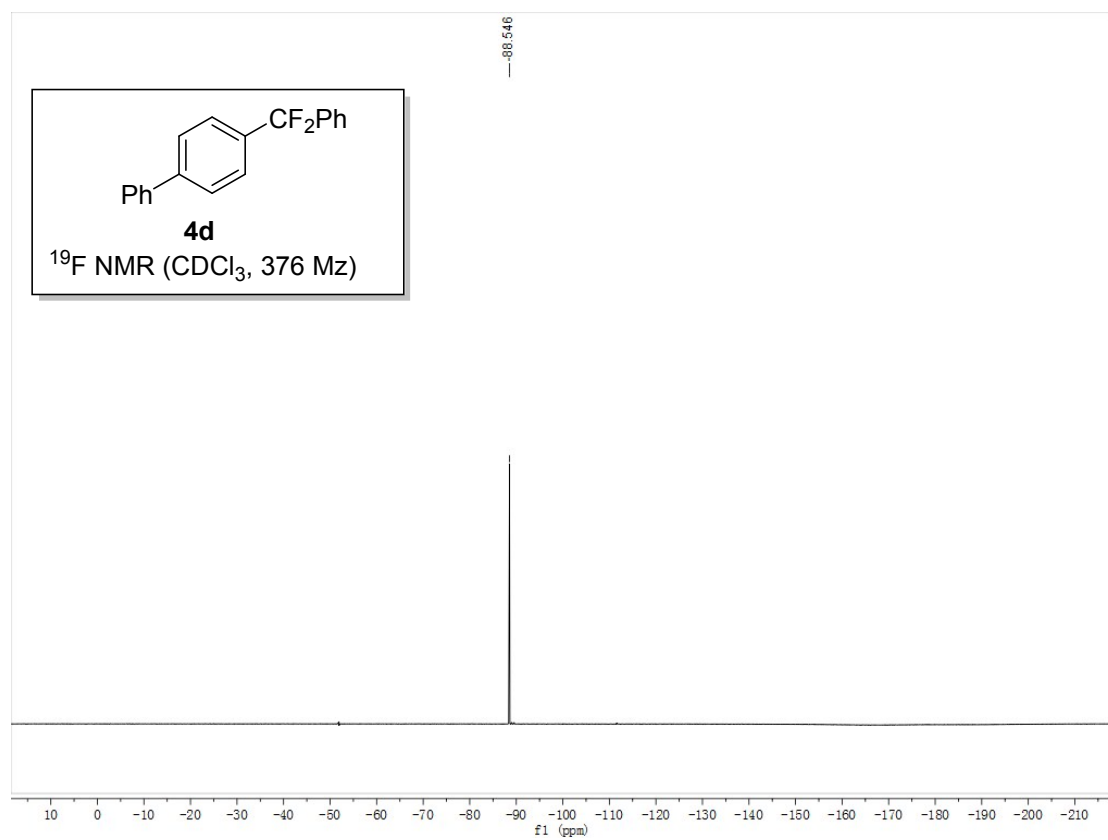

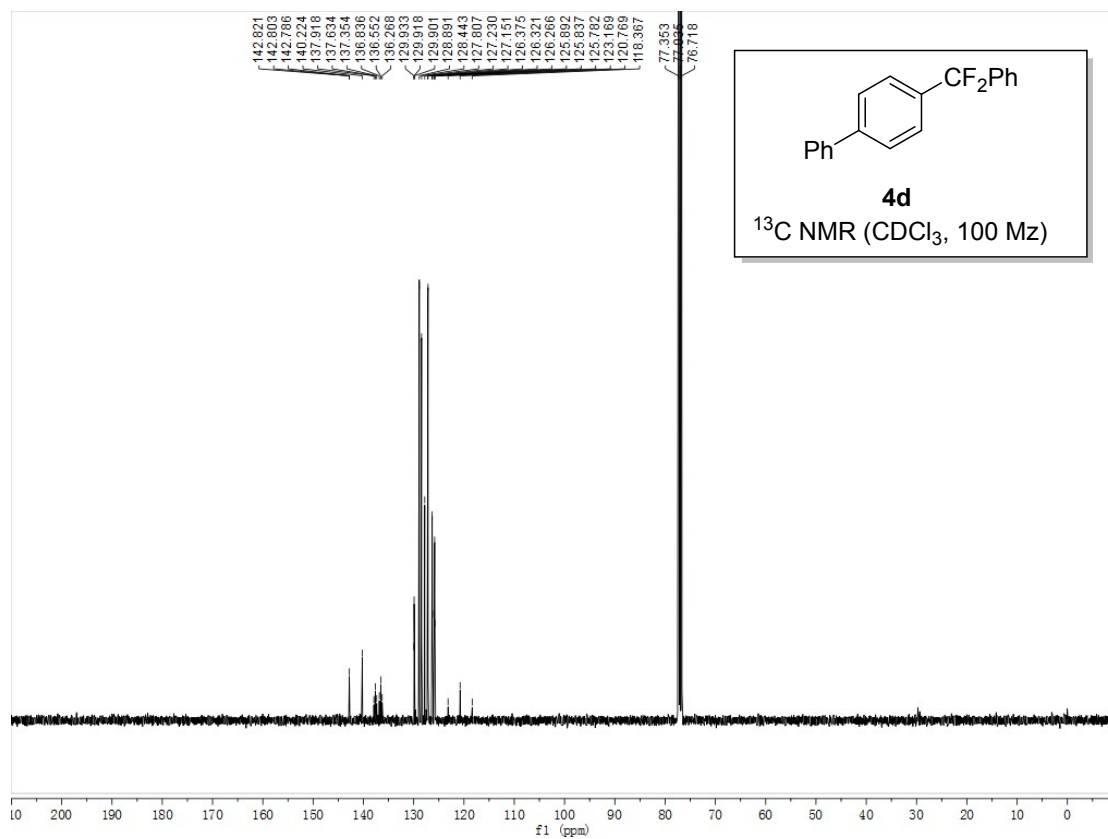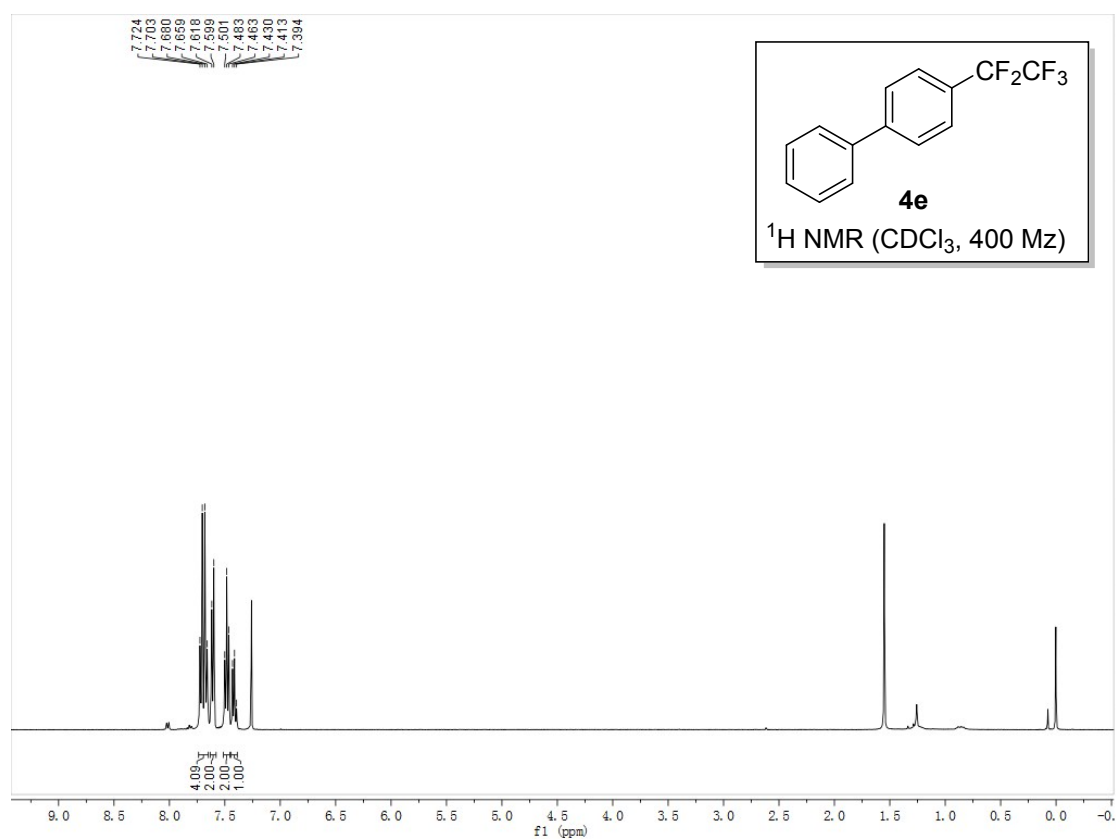

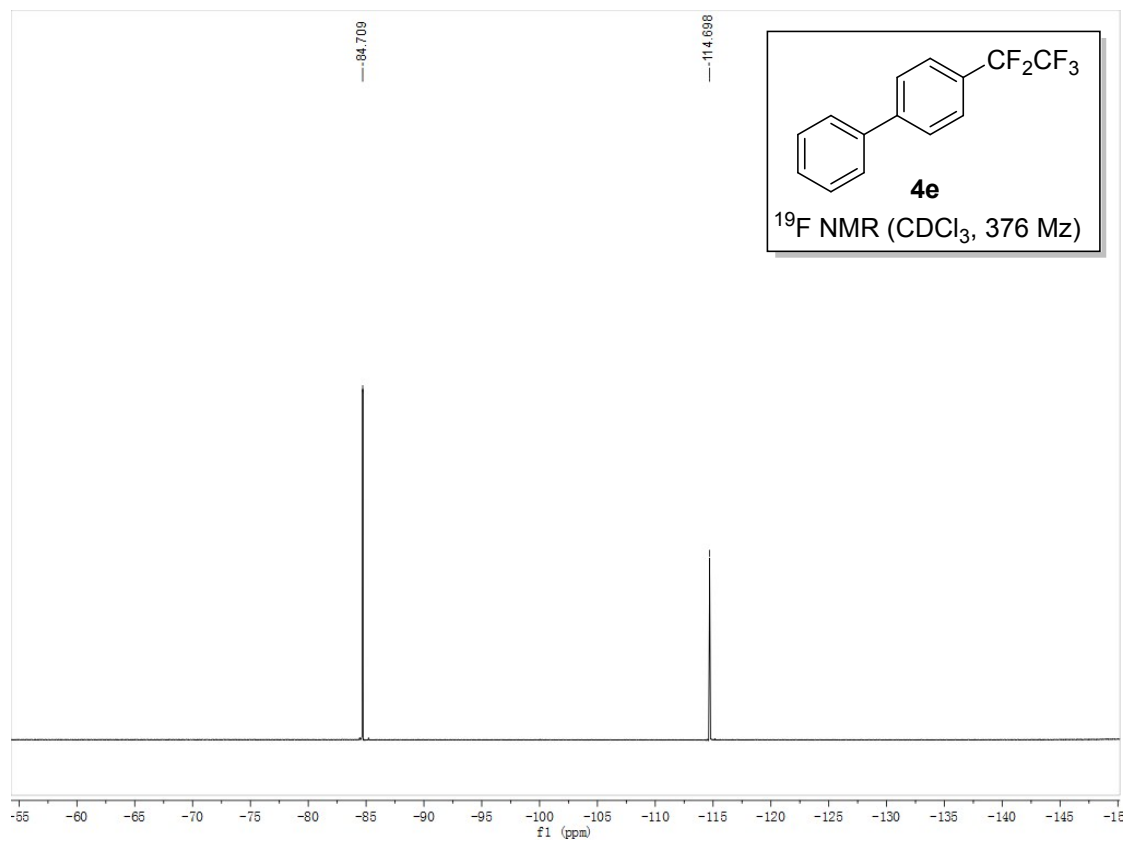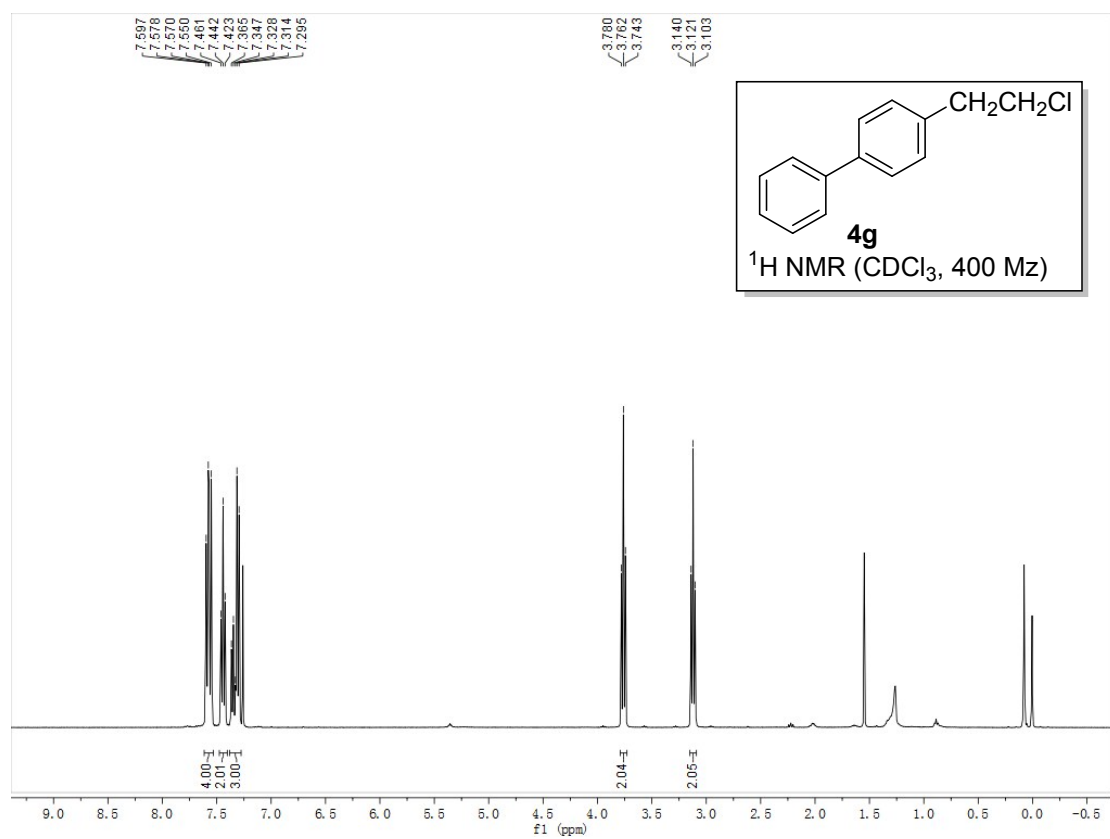



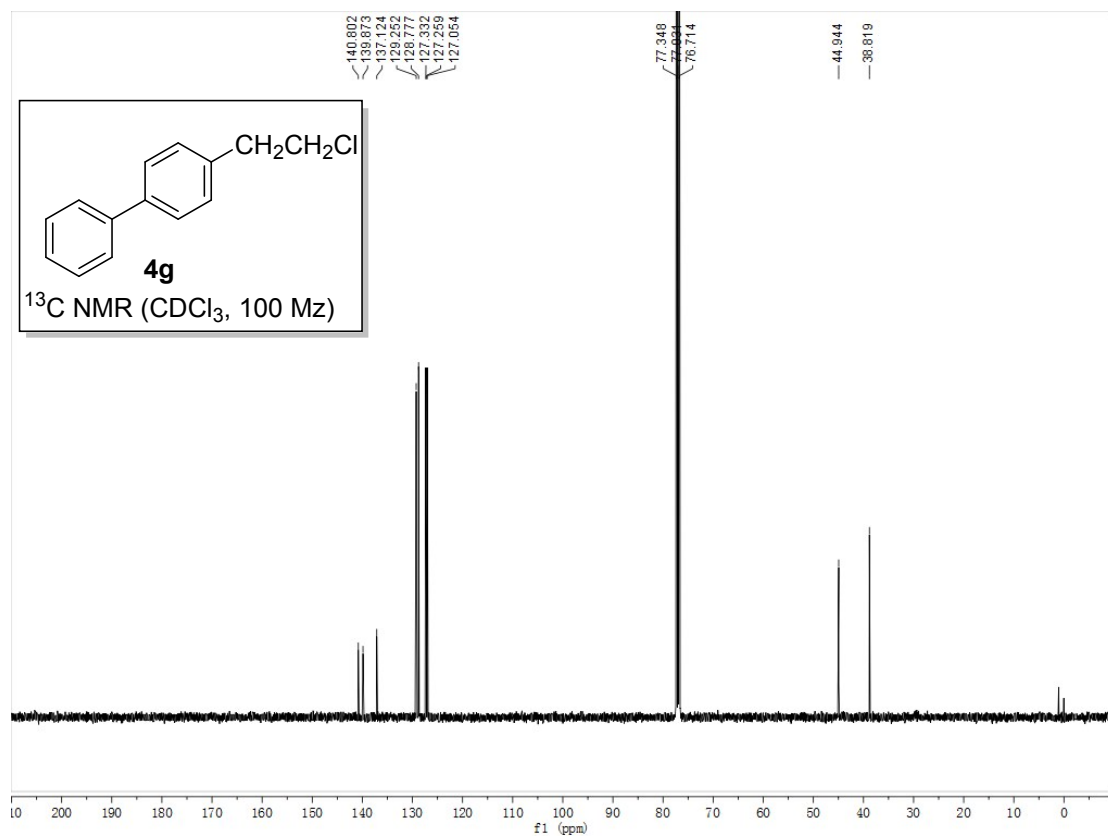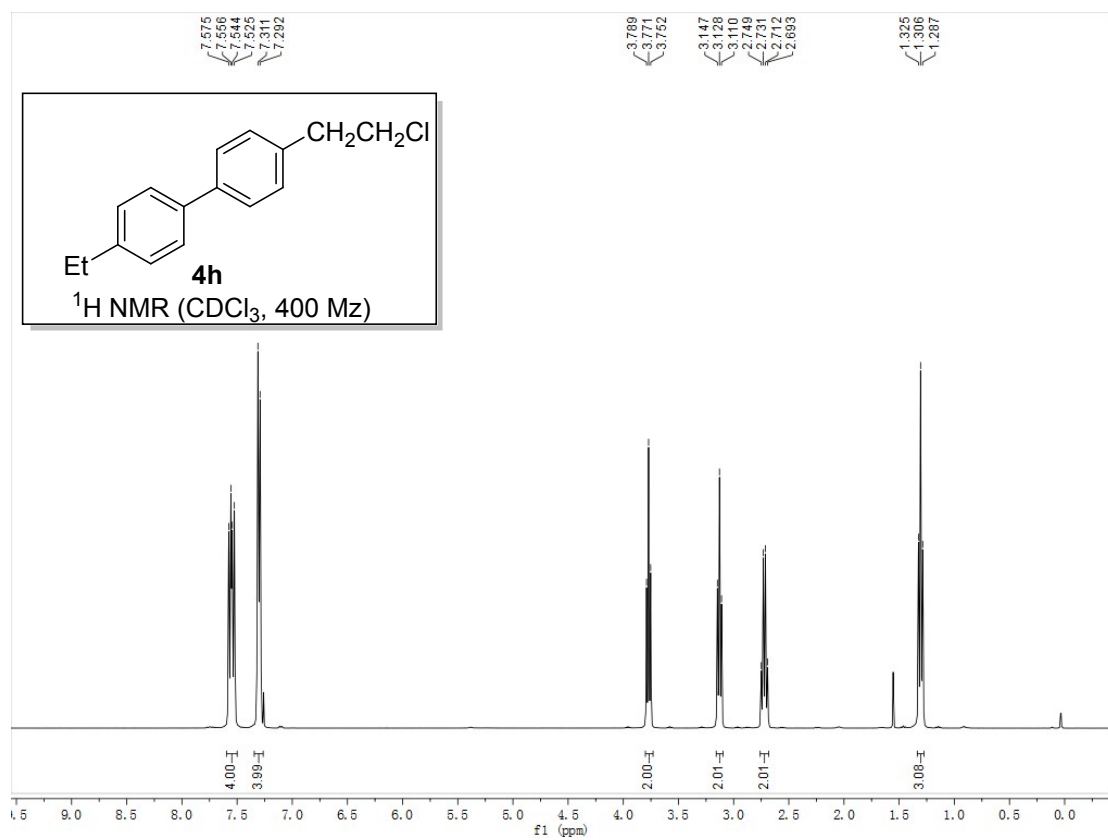

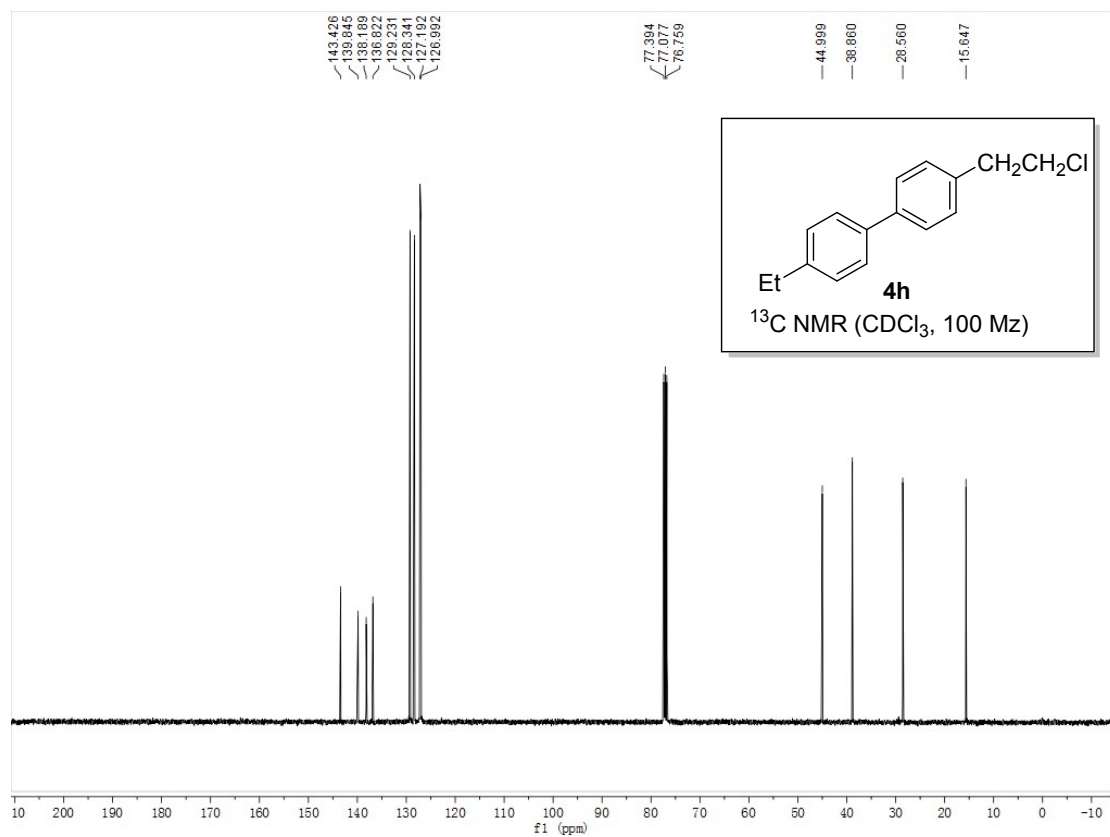

Supplement: c9ra06406k1.pdf [file c9ra06406k1.pdf]
